1 **Title:** Population structure and genomic evidence for local adaptation to freshwater and marine  
2 environments in anadromous Arctic Char (*Salvelinus alpinus*) throughout Nunavik, Canada

3 **Authors:** Xavier Dallaire<sup>1,2</sup>, Éric Normandeau<sup>1</sup>, Julien Mainguy<sup>3</sup>, Jean-Éric Tremblay<sup>4</sup>, Louis  
4 Bernatchez<sup>1</sup> and Jean-Sébastien Moore<sup>1,2</sup>

5  
6 <sup>1</sup> Institut de Biologie Intégrative et des Systèmes (IBIS), Université Laval, Québec, Québec, Canada  
7 G1V 0A6

8 <sup>2</sup> Centre d'Études Nordiques (CEN), Université Laval, Québec, Québec, Canada G1V0A6

9 <sup>3</sup> Ministère des Forêts, de la Faune et des Parcs, Québec, Québec, Canada G1S 4X4

10 <sup>4</sup> Québec Océan, Université Laval, Québec, Québec, Canada G1V0A6

11

12 Corresponding author email : [xavier.dallaire.2@ulaval.ca](mailto:xavier.dallaire.2@ulaval.ca)

13 Co-authors emails: [eric.normandeau@bio.ulaval.ca](mailto:eric.normandeau@bio.ulaval.ca), [julien.mainguy@mffp.gouv.qc.ca](mailto:julien.mainguy@mffp.gouv.qc.ca), [14 \[eric.tremblay@bio.ulaval.ca\]\(mailto:eric.tremblay@bio.ulaval.ca\), \[louis.bernatchez@bio.ulaval.ca\]\(mailto:louis.bernatchez@bio.ulaval.ca\), \[15 \\[sebastien.moore@bio.ulaval.ca\\]\\(mailto:sebastien.moore@bio.ulaval.ca\\)\]\(mailto:jean-</a></p></div><div data-bbox=\)](mailto:jean-</a></p></div><div data-bbox=)

16

## 17 **Abstract**

18 Distinguishing neutral and adaptive genetic variation is one of the main challenges in  
19 investigating processes shaping population structure in the wild. Despite marine environments  
20 being key habitats for the growth of anadromous fishes, landscape genomics studies on  
21 salmonids have generally focused on identifying signatures of adaptation to freshwater habitats.  
22 Unlike most other anadromous salmonids, Arctic Char (*Salvelinus alpinus*) occupy coastal habitats  
23 near their overwintering rivers during their marine phase, thus making adaptation to marine  
24 habitats possible. The aim of this study was to document the neutral and adaptive variation of  
25 populations among anadromous Arctic Char in Nunavik and bordering regions. We used GBS to  
26 genotype 20,327 filtered single nucleotide polymorphisms (SNPs) for 650 individuals sampled in  
27 23 locations along >2,000 km of coastline. Our results reveal a hierarchical genetic structure,  
28 whereby neighboring hydrographic systems harbour distinct populations grouping within major  
29 oceanographic basins, namely the Hudson Bay, Hudson Strait, Ungava Bay and Labrador Sea. We  
30 found genetic diversity and differentiation to be influenced by both post-glacial recolonization  
31 history and by patterns of isolation-by-distance reflecting contemporary gene flow. Furthermore,  
32 using three gene-environment association (GEA) methods we found genomic evidence for local  
33 adaptation to both freshwater and marine habitats, especially in relation to sea-surface and air  
34 temperatures during summer, precipitation, and salinity. This study is among the first to explicitly  
35 explore the genetic basis of marine adaptations in salmonids and highlights the complex  
36 interactions in selective pressures over the lifespan of anadromous fishes.

37 **Keywords:** population genomics, local adaptation, anadromous salmonid, marine ecosystems,  
38 Arctic

## 39 **1. Introduction**

40 Species experience different environmental conditions over their geographic ranges  
41 which may lead to local adaptation (Kawecki & Ebert, 2004; Williams, 1966). Local adaptation has  
42 been studied extensively via reciprocal transplant and common-garden field experiments, but  
43 these approaches do not provide information on the molecular basis of adaptation (Tiffin & Ross-  
44 Ibarra, 2014). New genomic methods are now commonly used to advance our understanding of  
45 local adaptation (Grummer et al., 2019; Luikart et al., 2018). Such adaptive genomic variation, as  
46 well as contemporary population genetic structure, are of great interest for both conservation  
47 and management to ensure actions target biologically significant units (Bernatchez et al., 2017;  
48 Funk, McKay, Hohenlohe & Allendorf, 2012).

49 Salmonids are a diverse family of fishes with high economic and cultural importance.  
50 Many populations have an anadromous life cycle, whereby individuals are born and reproduce  
51 in freshwater and migrate to the sea to feed and grow. Anadromous salmonids exhibit a homing  
52 behaviour, i.e. returning to their natal habitat for spawning (Quinn, 1993) and this behaviour  
53 reduces gene flow between populations, promoting genetic differentiation and local adaptation  
54 at fine spatial scales (Fraser, Weir, Bernatchez, Hansen & Taylor, 2011). Recent studies have  
55 identified genomic regions associated with many environmental parameters, including air  
56 temperature (Bourret, Dionne, Kent, Lien & Bernatchez, 2013; Hand et al., 2016; Perrier,  
57 Ferchaud, Sirois, Thibault & Bernatchez, 2017; Sylvester et al., 2018), precipitation (Hecht,  
58 Matala, Hess & Narum, 2015; Micheletti, Matala, Matala & Narum, 2018), geology (Bourret et al.  
59 2013), upstream catchment area (Pritchard et al., 2018) and migration distances (Hecht et al.,  
60 2015; Micheletti et al., 2018) in many species of salmon and trout.

61           On the other hand, little is known about the genomic basis of marine adaptations for  
62 these species despite the fact that they spend a significant proportion of their lives at sea. The  
63 capacity to identify divergent selective pressures on salmonid populations at sea is limited by  
64 their use of geographically extensive and shared offshore feeding grounds (Hecht et al., 2015;  
65 Quinn, 2005). However, other studies have shown populations of salmonids consistently  
66 occupying different marine distribution ranges that could be genetically determined (Fraser et  
67 al., 2011; Kallio-Nyberg et al., 2000). Moreover, sea surface temperature (SST) and salinity have  
68 been argued to be associated to adaptive genetic diversity in cold-water marine fishes (Atlantic  
69 Cod *Gadus morhua*: Barth et al., 2017; Atlantic Herring *Clupea harengus*: Guo, Li & Merilä, 2016;  
70 Three-spined stickleback *Gasterosteus aculeatus*: Guo, DeFaveri, Sotelo, Nair & Merilä, 2015),  
71 reinforcing the possible importance of marine habitats to local adaptation.

72           The Arctic Char (*Salvelinus alpinus*) is a salmonid fish with a circumpolar distribution and  
73 is known for its great diversity in life-history characteristics (Klemetsen, 2010). Anadromous  
74 individuals spend 3 to 9 years in cold oligotrophic freshwater at birth (Johnson, 1980), then  
75 complete annual migrations between marine habitats for summer foraging and lakes for  
76 overwintering. Although straying (i.e., an upstream migration in a non-natal river system) can  
77 occur, several studies have shown that Arctic Char maintained philopatric behaviour during  
78 reproductive years, limiting effective dispersal (Gyselman, 1994; Moore, Harris, Tallman & Taylor,  
79 2013; Moore et al. 2017). Moore et al. (2013) also argued that gene flow could be sufficiently low  
80 to allow for local adaptation among populations of eastern Baffin Island in the Canadian Arctic,  
81 while Moore et al. (2017) provided some genomic evidence for local adaptation to natal rivers at  
82 a fine spatial scale.

83           In marine environments, Arctic Char tend to stay near the surface (< 3m), with occasional  
84   dives up to 50m (Harris et al. 2020; Spares, Stokesbury, O’Dor & Dick, 2012) and preferably use  
85   nearshore habitats within 100 km from their natal river’s mouth (Dempson & Kristofferson, 1987;  
86   Layton et al., 2020; Moore et al. 2016). Thus, one could expect this behaviour to lead to Arctic  
87   Char populations experiencing more diverse marine conditions than other anadromous species.  
88   Madsen et al. (2019), for example, found that variation at a phenology-related locus among  
89   anadromous Greenlandic populations of Arctic Char was associated with the duration of the  
90   period spent foraging at sea, suggesting local adaptation to temperature regimes.

91           During the last glacial maximum (LGM), around 21,000 years ago, most of modern-day  
92   Canada was covered by glaciers (Dyke, 2004), contracting species’ ranges to ice-free glacial  
93   refugia. For most extant species in North America, contemporary intraspecific diversity was  
94   heavily impacted by post-glacial recolonization (Hewitt, 2000). Potentially strong demographic  
95   bottlenecks during glaciations has greatly reduced intraspecific genetic diversity and lead to  
96   divergent glacial lineages that survived in different refugia (Hewitt, 2000). For example, it is  
97   documented that glaciations have had an important impact on fish lineages and their genetic  
98   diversity (April et al. 2013; Bernatchez & Wilson, 1998). In addition, secondary contact between  
99   intraspecific glacial lineages have been shown to have commonly occurred among temperate  
100   freshwater fishes (e.g. Atlantic Salmon *Salmo salar*: Bradbury et al., 2015; Lake Cisco *Coregonus*  
101   *artedi*: Turgeon & Bernatchez, 2001; Lake Whitefish *Coregonus clupeaformis*: Bernatchez &  
102   Dodson 1990)

103           The contemporary distribution of Arctic Char closely matches the Weichsel-Winsconsin  
104   glaciation extent (Klemetsen et al., 2003). In North America, Arctic Char comprises four known

105 mitochondrial DNA (mtDNA) lineages associated with distinct glacial refugia (Brunner, Douglas,  
106 Osinov, Wilson & Bernatchez, 2001; Moore, Bajno, Reist & Taylor, 2015). Nunavik, situated in  
107 northern Québec (Canada), is one of the last regions in North America to have deglaciated  
108 following LGM (Dyke, 2004). It is bordered by the Hudson Bay, Hudson Strait, and Ungava Bay.  
109 These three marine regions are contrasted in their surface temperature, salinity, productivity and  
110 tidal regimes (Prisenberg, 1984; Savard et al., 2014). The Arctic and Atlantic mitochondrial  
111 lineages are predominant in Nunavik and bordering regions (Brunner et al., 2001, Moore et al.,  
112 2015). The exact extent of secondary contact between those two lineages is still poorly  
113 understood, but Salisbury, McCracken, Keefe, Perry and Ruzzante (2019) recently reported fully  
114 admixed populations across northern Labrador.

115         The current study applies population genomic methods in order to investigate the relative  
116 role of neutral (demographical and historical) vs. adaptative processes in shaping contemporary  
117 population structure of anadromous Arctic Char over 3,000 km of coastline in Nunavik, Québec,  
118 Canada. Specifically, we first document its neutral genetic structure in relation to post-glacial  
119 history by i) delimiting putative populations via a clustering analysis, ii) comparing levels of  
120 genetic diversity between geographic regions, and iii) investigating patterns of isolation-by-  
121 distance and the importance of potential barriers to migration. Second, since we expected broad-  
122 scale variation in both freshwater and marine environments to be the source of divergent  
123 selective pressures, we attempt to detect evidence of local adaptation in Arctic Char around  
124 Nunavik and bordering regions. We extracted various environmental variables representing the  
125 different habitats occupied by Arctic Char to determine i) if marine and freshwater conditions

126 both explained significant proportions of the observed genetic variation, and ii) whether  
127 candidate SNPs associated with environmental factors in both habitats could be identified.

## 128 **2. Methods**

### 129 **2.1 Sampling**

130 Arctic Chars were sampled in 23 water bodies across Nunavik, Southern Baffin Island, and  
131 Labrador (Figure 1). In Nunavik and Baffin Island, adult fish were harvested during their upstream  
132 migration using gillnets or counting weirs. In most localities throughout Nunavik, sampling  
133 locations were selected in concert with local and regional Inuit wildlife managers, and sampling  
134 was done with the assistance of local Inuit guides, in order to prioritize fish populations with an  
135 importance for traditional fishing. In two locations (Deception Bay and Hopes Advance Bay),  
136 samples were taken in the estuary as well as in two tributary rivers. Juvenile fish were captured  
137 by electrofishing in two rivers near Nain, Labrador. Adipose fin clips were collected from each  
138 fish and preserved in ethanol 95%.

### 139 **2.2 Library preparation, sequencing and SNP calling**

140 DNA was extracted from fin clips using a modified version of Aljanabi & Martinez (1997).  
141 Agarose gel electrophoresis was used to assess DNA quality and the quantity and quality of DNA  
142 was evaluated by NanoDrop spectrophotometer (Thermo Scientific). Ten (10)  $\mu$ l of DNA samples  
143 were normalized to a concentration of 10 ng/ $\mu$ l using Quant-iT Picogreen dsDNA Assay Kit  
144 (Invitrogen) for precision quantification. Genotyping-by-sequencing (GBS) libraries were  
145 prepared with a modified version of the Abed et al. (2019) two-enzyme GBS protocol, using *Pst*I  
146 and *Msp*I restriction enzymes. Samples were randomly assigned to libraries to limit batch effects.

147 Sequencing was done on Ion Torrent p1v3 chips with a median target of 80 million single-end  
148 reads per chip. Each library was sequenced on 3 separate chips, and the volume of DNA from  
149 each sample was adjusted after the first chip to reduce the unbalanced representation of  
150 individuals in sequences.

151 We processed the data and filtered the SNP dataset using a RADseq workflow  
152 ([https://github.com/enormandeu/stacks\\_workflow](https://github.com/enormandeu/stacks_workflow)) built around STACKS2 (Rochette, Rivera-  
153 Colón & Catchen, 2019). In short, the sequences were trimmed at 80 base pairs and aligned on  
154 the Arctic Char reference genome (ASM291031v2; NCBI RefSeq: GCF\_002910315.2; Christensen  
155 et al., 2018) using Burrows-Wheeler Aligner (BWA; Li & Durbin, 2009). SNPs were called on  
156 polymorphic genotypes with at least 4X coverage, present in at least 60% of samples of all  
157 sampling sites and with the minor allele present in a minimum of 3 samples. Samples with more  
158 than 20% of missing data or with heterozygosity ( $F_{IS}$ ) under -0.2 were removed.

159 Salmonid fishes have a common ancestor that experienced a whole-genome duplication  
160 approximately 60 MYA (Crête-Lafrenière, Weir & Bernatchez, 2012), and many genetic markers  
161 identified in our analyses are expected to be situated on paralogous loci of similar sequences.  
162 While these loci may be important for adaptation (Kondrashov, 2012), they were removed due  
163 to the fact that these markers do not behave like bi-allelic SNPs and because genotyping is  
164 difficult without very high coverage (>100 reads; Dufresne, Stift, Vergilino & Mable, 2014). SNPs  
165 on duplicated loci were categorized and filtered using an adapted *HDplot* procedure (McKinney,  
166 Waples, Seeb & Seeb, 2017), which identifies paralogs by visually comparing the allelic ratio, the  
167 proportion of heterozygotes and homozygotes of the rare allele, and the  $F_{IS}$  value for each SNP.  
168 We also filtered the markers to avoid linked SNPs while keeping a maximum of information: for



169 each pair of SNPs on the same locus, we assessed linkage considering samples without missing  
170 data where at least one of the two genotypes contains the rare variant. If the two markers have  
171 identical genotypes in more than 50% of these samples, the pair were considered linked and only  
172 the first SNP was kept.

### 173 2.3 Identification of putative neutral markers

174 Markers potentially under selection were identified using two methods: pcadapt (Luu,  
175 Bazin & Blum, 2017) and Baypass (Gautier, 2015). SNPs identified as outliers by at least one  
176 method were removed to produce a putatively neutral dataset. The R package pcadapt identifies  
177 outlier SNPs in relation to population structure using principal components analyses (PCA). The  
178 first 11 PCs were used, based on visual evaluation of PCA scores and scree plots, and SNPs with  
179 minor allele frequencies under 0.05 were ignored, as recommended by pcadapt authors. The  
180 core model implemented in Baypass v 2.1 computes a differentiation measure called XtX, which  
181 is an analog to an SNP-specific  $F_{ST}$  corrected for the allele frequency covariance between  
182 populations (Günther & Coop, 2013). The threshold to distinguish neutral from potentially  
183 selected markers was set as the 5th (balancing selection) and 95th (divergent selection)  
184 percentile of the XtX distribution obtained by running the core model on a pseudo-observed SNP  
185 dataset produced following the Baypass manual. Briefly, this 100,000-SNPs dataset was  
186 simulated with the function `simulate.baypass`, which allows for the inclusion of the allele  
187 frequency covariance matrix of our original dataset in order to emulate its demographic history.

## 188 2.4 Basic statistics and population structure

189 Population genetic statistics were computed from the putatively neutral dataset.  
190 Observed and expected heterozygosity were calculated by population using GenoDive v3.0  
191 (Meirmans & Van Tienderen, 2004). We used vcftools v0.1.13 (Danecek et al., 2011) to measure  
192 the proportion of heterozygous SNPs for each individual, and we calculated the number of  
193 polymorphic SNPs in each population. Effective population sizes ( $N_e$ ) and 95% confidence  
194 intervals were estimated with Neestimator v2.01 (Do et al., 2014) using the linkage disequilibrium  
195 method on markers with minor allele frequencies over 0.05.

196 Spatial patterns of genetic diversity were compared between putative regions, using the  
197 individual proportion of heterozygous SNPs. A nested ANOVA was performed with the regions as  
198 groups and the non-estuarine sampling sites as subgroups. To account for our unbalanced  
199 sampling design, we did a comparison of estimated marginal means (or least-square means) with  
200 the Satterthwaite approximation of degrees of freedom (Satterthwaite, 1946) on a linear mixed-  
201 effect model with a random effect of the sampling site, in the R packages *lme4* (Bates, Mächler,  
202 Bolker & Walker, 2015) and *emmeans* (Lenth, 2019).

203 We used a principal coordinate analysis (PCoA) in the R package *dartR* (Gruber, Unmack,  
204 Berry & Georges, 2018) to document population structure using the neutral data set. We also  
205 estimated ancestry with the maximum likelihood approach implemented in ADMIXTURE  
206 (Alexander, Novembre & Lange, 2009) with the number of genetic clusters (K) ranging from 1 to  
207 20. To mitigate the effects of imbalance in sample size among geographical regions, only non-  
208 estuarine sampling sites were included in the global ADMIXTURE analysis. We considered the  
209 value of K yielding the lowest cross-validation error to be the number of genetic groups best

210 supported by ADMIXTURE. Based on this K value, we identified contiguous sampling sites where  
211 most individuals shared a common cluster membership and repeated the ADMIXTURE analysis  
212 within those sites with K ranging from 1 to 6. Estuarine sampling sites were included in this  
213 second round of analyses.

## 214 2.5 Landscape genetics

215 Pairwise population  $F_{ST}$  were calculated with the R package *StAMPP* (Pembleton et al.,  
216 2013), and a 1000-permutations bootstrap estimated their significance value.  $F_{ST}$  calculations  
217 were performed on both the complete and neutral datasets. The geographic marine distance  
218 separating populations was measured between the coordinates at the mouth of sampled rivers  
219 by a least-cost path in the R package *marmap* (Simon-Bouhet, 2013), using NOAA bathymetric  
220 data at a 4-minutes resolution to discriminate land and sea.

221 We tested for the presence of isolation-by-distance (IBD) with a linear mixed-effect  
222 model. Linearized  $F_{ST}$  ( $F_{ST}/(1-F_{ST})$ ), based on the neutral dataset, was used as the dependent  
223 variable and marine distance as a fixed effect. Patterns of IBD between pairs of populations on  
224 the same coast versus pairs on either side of Hudson Strait were compared by the inclusion of a  
225 categorical fixed effect. To characterize the impact of Hudson Strait as a barrier to gene flow both  
226 locally and globally, analyses were performed on all non-estuarine sites, then only on non-  
227 estuarine sites within 250 km of the Hudson Strait. To account for the non-independence of  
228 pairwise distances, the model was run with a maximum likelihood population effect  
229 parameterization (MLPE) (Clarke, Rothery & Raybould, 2002) with and without restricted  
230 maximum likelihood (REML), using the *MLPE.lmm* function in the R package *ResistanceGA*  
231 (Peterman, 2018). Models without REML were compared with conditional Akaike Information

232 Criterion (cAIC; Vaida & Blanchard, 2005) in the R package *cAIC4* (Säefken, Ruegamer, Baumann  
233 & Kruse, 2019), and with marginal  $R^2$  (Nakagawa & Schielzeth, 2013) in the R package *MuMIn*  
234 (Barton, 2019) for models with REML.

## 235 2.6 Gene-environment association

236 We used the ArcGIS software v10.4 (ESRI, 2011) to extract environmental data from BIO-  
237 Oracle v2.0 (Assis et al., 2018), Marspec (Sbrocco & Barber, 2013), and WorldClim v2.0 (Fick &  
238 Hijmans, 2017) (Table 1). Tide data were obtained from FES2014, produced by Noveltis, Legos  
239 and CLS and distributed by Aviso+, with support from Cnes (<https://www.aviso.altimetry.fr/>).  
240 Marine variables represent sea-surface values for factors of potential biological importance for  
241 Arctic Char and were aggregated in a 20 km radius around each river mouth and within 5 km from  
242 the coast, as to best represent the local coastal environment based on existing knowledge of  
243 Arctic Char marine habitat use from other geographical regions (Spares, Stokesbury, Dadswell,  
244 O’Dor & Dick, 2015; Moore et al., 2016). Freshwater variables comprise the area of the watershed  
245 upstream of the sampling site, as well as air temperature and precipitation statistics on these  
246 areas. Air temperature is commonly used as a proxy for freshwater temperature in remote areas  
247 where, as supported by studies linking the growth rate of Lake Trout to air temperature (Black,  
248 von Biela, Zimmerman & Brown, 2013; Torvinen, 2017).

249 To deal with co-linearity, a PCA was performed on each set of environmental factors, and  
250 the PCs explaining more than 10% of the total variance were used as explanatory variables in  
251 gene-environment association (GEA) analyses. Candidate SNPs associated with environmental  
252 variables were identified with a combination of three methods: RDA, LFMM, and Baypass. Genes  
253 within 10,000 base pairs were recorded using bedtools (Quinlan, 2014) for candidate SNPs

254 identified by at least 2 methods. We consulted the UniProt database (The Uniprot Consortium,  
255 2019) for information on biological gene function in Atlantic Salmon, Zebrafish (*Danio rerio*), or  
256 other organisms.

### 257 2.6.1 RDA

258 We used a redundancy analysis (RDA, Legendre & Gallagher, 2001), a form of constrained  
259 ordination, implemented in R package *vegan* (Oksanen et al., 2012) to investigate multivariate  
260 correlations of genotypes (in the form of allele frequencies by population) with environmental  
261 variables. We took into account structure in the data which derives from spatial patterns with a  
262 distance-based Moran's eigenvector map (dbMEM; Borcard & Legendre, 2002; Peres-Neot &  
263 Legendre, 2010). In order to build this map, we transformed pairwise marine distances measured  
264 in the section above in Euclidian distances by creating a Delaunay graph with the function  
265 `chooseCN` in the R package *adegetnet* (Jombart, 2008). We then used the R package *adespatial*  
266 (Dray et al., 2016) to make the dbMEM. Eigenvector reflecting positive spatial autocorrelation  
267 and not correlated with environmental dimensions were used as covariables in a partial RDA.  
268 Significant spatial eigenvectors uncorrelated with environmental factors were included for these  
269 analyses, as suggested by Forester, Lasky, Wagner and Urban (2018).

270 Spatial and environmental factors were separately submitted to a backward model  
271 selection with the function `ordistep` in the R package *vegan*, and only significant ( $p < 0.05$ )  
272 covariables were included in the final RDA. Proportions of genetic variance explained solely or  
273 jointly by each set of covariables were estimated by comparing adjusted  $R^2$  in a series of partial  
274 RDAs (Peres-Neto & Legendre, 2010), of which we assessed significance using an ANOVA-like

275 permutation test with 1000 steps. Z-scores were obtained for the distribution of individual SNP  
276 loadings on RDA axes explaining a significant portion of genetic variation ( $p < 0.05$ ), and SNPs  
277 were defined as outliers if their absolute maximal Z-score was over 2.5 ( $p < 0.012$ ).

## 278 2.6.2 LFMM

279 Latent factor mixed models (LFMM; Frichot, Schoville, Bouchard & François, 2013)  
280 determine loci-environment associations using a Bayesian mixed-model with environmental  
281 variables as fixed effects. Latent factors are derived from a principal components analysis and  
282 used as random effects to control for population structure. Missing data in the genetic dataset  
283 were imputed based on the most frequent genotype in the sampling site and we used the  
284 `lfmm_ridge` function of the R package *lfmm* (Caye, Jumentier, Lepeule & François, 2019). The  
285 optimal number of latent factors (K-value) and regularization parameters ( $\lambda$ ) were chosen  
286 to minimize predictor error by using a cross-validation method as advised in the *lfmm* manual. P-  
287 values were calibrated using the genomic control method and false discovery rate (q-value) was  
288 calculated following the Benjamini-Hochberg procedure in the *qvalue* R package. Associations  
289 between a SNP and environmental factor with q-value  $< 0.05$  were considered significant.

## 290 2.6.3 Baypass

291 The standard covariate (STD) model implemented in Baypass assesses associations  
292 between allele counts and population-specific covariates using Bayesian Factors (BFs) (Gauthier  
293 2015). We estimated BFs by calculating the median of 5 runs of the STD model with the  
294 importance sampling algorithm (Coop et al., 2010). We controlled for the neutral population  
295 structure by providing the omega matrix computed by the core model implemented in Baypass.

296 Pairs of markers and covariates with a BF > 10 decibans (dB) had strong evidence for their  
297 association (Jeffreys, 1961, revised by Lee & Wagenmakers, 2013).

### 298 **3. Results**

299 We sequenced a total of 864 samples, of which 95 did not pass our filtering criteria. We  
300 discarded 3 sampling sites (119 individuals) that either had too few samples, had no access to  
301 sea, or targeted a population reintroduced from a hatchery brood. Retained individuals (n = 650)  
302 had 2.217 million reads on average. A total of 31,535 SNPs was called and passed basic filtering  
303 in STACK2. Among these, 7,244 SNPs were categorized as duplicates and removed (Figure S1) and  
304 3,130 SNPs were pruned during linkage disequilibrium assessment. The final dataset used in  
305 subsequent analyses comprised 20,327 SNPs (see Table S1 for exact criteria and number of  
306 filtered SNPs), with a global 7.02% missing genotypes. The core model in Baypass identified 857  
307 SNPs under balancing selection ( $XtX < 17.95$ ), 643 SNPs under divergent selection ( $XtX > 28.02$ ),  
308 and pcadapt marked 198 SNPs as outliers (q-value < 0.05), for a total of 1,698 markers identified  
309 as putatively adaptive by at least one method. The remaining 18,703 SNP markers were  
310 considered as putatively neutral.

#### 311 **3.1 Population structure**

312 Population statistics are presented in Table 2.  $N_e$  ranged from 61.9 to 734.5 and was  
313 correlated with catchment area (30 – 43,496 km<sup>2</sup>, log-transformed,  $r = 0.43$ ,  $p = 0.0499$ ), but the  
314 Payne River (PAY) had among the lowest  $N_e$  value (96.0) despite having the largest catchment  
315 area. The first axis of the PCoA reflected the longitude of the sampling sites, while the second  
316 axis differentiated populations in Western Ungava Bay from all other sampling sites (Figure 2).

317 Genetic diversity ( $H_e$ ) and mean proportion of heterozygous markers in individuals were highly  
318 correlated ( $r = 0.90$ ) and varied regionally (Figure 3). Notably, southern Hudson Bay displayed the  
319 lowest observed proportion of heterozygous markers, and both southern and northern Hudson  
320 Bay had lower values than Hudson Strait ( $\alpha = 0.05$ ). In Ungava Bay, eastern sampling sites had a  
321 diversity similar to Labrador, and higher diversity than western sampling sites. Mean individual  
322 proportion of heterozygous markers was also correlated with number of polymorphic SNPs ( $r =$   
323  $0.78$ ) at sampling site, but not to  $N_e$  ( $r = 0.16$ ,  $p = 0.46$ ).

324 The number of genetic clusters best supported by an ADMIXTURE analysis with all non-  
325 estuarine sampling sites was 13 (Figure S2 for comparison of cross-validation errors). At this level,  
326 individuals within a sampling site were generally homogenous in their membership to clusters  
327 (Figure 4). Sampling sites sharing a similar membership to clusters included sites in Labrador, two  
328 groups of 3 sampling sites in Northern and Southern Hudson Bay, and all pairs of rivers with a  
329 common estuary except the Leaf (FEU) and Bérard (BER) rivers. ADMIXTURE best supported  $K =$   
330  $1$  within those groups, but cross-validation errors for  $K = 2$  were in some cases only slightly higher  
331 (Table S2), which hints at weak population structure at a local scale. Individual cluster  
332 membership for  $K = 2$  and  $K = 3$  was then only loosely linked to the sampling site, except in  
333 Labrador sites, where samples were collected as juveniles.

### 334 3.2 Landscape genetics

335  $F_{ST}$  calculated by pairs of sampling sites ranged between  $-0.002$  and  $0.329$  (Table S3). All  
336  $p$ -values for comparisons with neutral loci were  $< 0.001$ , except for a pair of sampling sites on  
337 rivers sharing an estuary ( $p_{CHR-VOL} = 0.568$ ) and some pairs of sampling sites on a river and its



338 estuary ( $p_{\text{BDE-FRM}} = 0.015$ ;  $p_{\text{BDE-DUQ}} = 0.003$ ). These results suggest that all unlinked systems likely  
339 harbour genetically distinct populations, although the extent of differentiation is highly variable.

340 When examining IBD over all populations, a positive correlation was found between  
341 linearized  $F_{\text{ST}}$  and marine distances (Table 3), but the inclusion of the effect of crossing the  
342 Hudson Bay (CROSSHS) did not improve the model, based on marginal  $R^2$ . However, similar  
343 analyses focusing on sampling sites within 250 km of the Hudson Strait showed higher linearized  
344  $F_{\text{ST}}$  in pairs of populations on either side of the Hudson Strait than in pairs on the same coast  
345 (Figure 5).

### 346 3.3 Gene-Environment association

347 Freshwater and marine environmental factors were each summarized with 3 PC axes  
348 (Table 2), and correlation coefficients between components of either environment ranged  
349 between 0.05 and 0.62 (Figure S4). The distance-based Moran's eigenvector map produced 12  
350 eigenvectors reflecting negative autocorrelation and 4 eigenvectors for positive autocorrelation  
351 (MEM1 – 4, see Figure S5). Model selection for the RDA excluded MEM3 ( $p = 0.12$ ), MEM4 ( $p =$   
352  $0.32$ ), as well as the third freshwater component (F3,  $p = 0.07$ ). All three sets of covariables  
353 (spatial, marine and freshwater) explained a significant component ( $p < 0.05$ ) of the genetic  
354 variation, with 17.0% explained exclusively by one set, 14.9% jointly by two sets, and 6.7% by all  
355 three sets (Figure 6A).

356 MEM1 was highly correlated with the first marine components (M1,  $r = -0.94$ ) and MEM2  
357 was linked to the first freshwater component (F1,  $r = 0.81$ ). Thus, no spatial covariable was  
358 included in the RDA for the identification of candidate SNPs associated with the environment.

359 The three first axes of the RDA comprised a total of 41.5% of the explained variance ( $\text{adj } R^2 =$   
360 0.36, Figure 6B-E). No outliers ( $Z > 2.5$ ) were identified on RDA1, but genetic markers detected  
361 on RDA2 were most correlated with either M1 ( $n = 53$ ) or F1 ( $n = 4$ ), while markers on RDA3 were  
362 most correlated with F2 ( $n = 79$ ) or M2 ( $n = 17$ ).

363 LFMM identified a total of 228 outlier SNPs ( $q < 0.05$ ), 122 of which were associated with  
364 at least one marine component and 119 with a freshwater component. A total of 22 SNPs was  
365 significantly associated with more than one environmental component. The IS model under  
366 Baypass identified 185 SNPs ( $\text{BF} > 10 \text{ dB}$ ). Of these, 113 being associated with a marine variable,  
367 77 with a freshwater variable, and only 5 linked to both M2 and F2 (Figure S6).

368 Of the markers considered, 52 were identified as associated with an environmental factor  
369 by at least two GEA methods (Figure 7). Of those markers, 23 were related to M1 (summer SST,  
370 tides, turbidity), 18 were related to F2 (summer air temperature), and 3 were associated with  
371 different environmental components depending on the method. We identified a total of 51  
372 named genes within 10,000 base pairs of candidate SNPs, covering a wide range of biological  
373 functions. Among those were genes related to immune response (3.5% of genes), development  
374 of the nervous system (7.1%), heart (5.3%) and skeletal muscle (3.5%), as well as processes  
375 affecting gene expression (Table S5).

## 376 **4. Discussion**

377 Anadromous salmonids have recently been the subject of many studies in landscape  
378 genomics, as these provide key information for their conservation and management. We  
379 document patterns of neutral and adaptive genetic variation in anadromous Arctic Char

380 populations in the Nunavik region using genomic data. This is the broadest assessment of  
381 genomic variation in this important species to date. By combining fine- and broad-scale sampling,  
382 we clearly reveal a hierarchical genetic structure. Neighboring hydrographic systems generally  
383 harbor distinct populations that can be regrouped within oceanographic basins, while  
384 differentiation was also influenced by isolation-by-distance. To assess the potential for local  
385 adaptation to the contrasted environments in our study area, we combined three gene-  
386 environment association (GEA) methods. We found genomic evidence for local adaptation to  
387 both freshwater and marine habitats, a novel finding given that studies of local adaptation in  
388 salmonids usually focus solely on freshwater habitat characteristics

#### 389 4.1 Neutral structure in a post-glacial context

390 The entire area surveyed in this study was covered by ice from the last glacial maximum  
391 up to approximately 9,000-11,000 years ago (Dyke, 2004). Arctic Char are thought to have rapidly  
392 recolonized habitats following the retreat of the glaciers (Power, Pope & Goad, 1973; Hammar,  
393 1987) and have relatively long generation time (Gulseth & Nilssen, 2001). We thus expected the  
394 contemporary neutral genetic structure of Arctic Char populations in Nunavik to be heavily  
395 influenced by their recent post-glacial recolonization history.

396 Here, fish from the western Arctic glacial refugium would have crossed the Canadian  
397 Arctic Archipelago from west to east through the Lancaster Sound, which broke free of ice around  
398 9,000 years ago (Dyke, 2004), then by following the eastern coast of Baffin Island (Brunner et al.,  
399 2001; Moore et al., 2015). Access to Nunavik via Foxe Basin would have been impossible until  
400 less than 6,500 years ago. Fish from the Atlantic lineage, which we expect to have crossed the  
401 Atlantic Ocean from the Palearctic during the last deglaciation (Brunner et al., 2001; Wilson,

402 Hebert, Reist & Dempson, 1996), could have been present in southern Labrador and  
403 Newfoundland over 10,000 YBP (Dyke, 2004). Salisbury et al. (2019), through analysis of  
404 mitochondrial DNA, showed an overlap of the Arctic and Atlantic lineages in Northern Labrador  
405 (55 – 59° latitude), and an absence of correlation between latitude and lineage prevalence  
406 suggests a complete introgression of fish from the Arctic and Atlantic lineage origins in the region.  
407 While our results do not inform on the extent of the secondary contact between lineages,  
408 admixture in the eastern part of our study area could explain the higher genetic diversity, as  
409 expected during secondary contact of marine fishes (Bay & Caley, 2011; Grant & Bowen, 1998)

410 By 8,000 YBP, most of Hudson Strait and most of the coast of Labrador were free of ice  
411 while most of the Hudson Bay and the Ungava Bay remained glaciated. Finally, by 6,500 – 7,200  
412 YBP, the coasts of Hudson Bay and Ungava Bay deglaciated, meaning those regions would be the  
413 last to have been colonized by Arctic Char. The loss of genetic diversity we observed along the  
414 coast from Hudson Strait to southern Hudson Bay, as well as low  $F_{ST}$  values between populations  
415 within the Hudson Bay region, are consistent with expectations of a recent range expansion,  
416 perhaps associated with successive founder effects and loss of heterozygosity (Eckert, Samis &  
417 Loughheed, 2008; Goodsman, Cooke, Coltman & Lewis, 2014). Similar patterns were found in  
418 European lamprey species (*Lampetra* spp.), with diversity and differentiation decreasing in  
419 populations far from the Iberic glacial refugia (Mateus et al., 2018), and in Scottish populations  
420 of Atlantic Salmon, where genetic diversity was lower in more recently deglaciated regions  
421 (Cauwelier et al., 2018).

## 422 4.2 Contemporary gene flow

423 Our results revealed a hierarchical genetic structure with most geographic regions  
424 containing distinct populations of Arctic Char in every sampled river not sharing an estuary.  
425 However, population structure in Hudson Bay appeared weaker, as there were signs of admixture  
426 between rivers within 100 km. As discussed earlier, other studies on Arctic Char have attributed  
427 low genetic differentiation over long distances to recent post-glaciation colonization events  
428 (Moore et al., 2013; O'Malley et al., 2019). However, lower salinity and a longer summer period  
429 in Hudson Bay could also lead to higher connectivity between estuaries.

430 As migration in Arctic Char has been found to be predominantly coastal (Moore, 1975;  
431 Moore et al., 2013, 2015; Spares et al., 2012), we expected the Hudson Strait, a 120-km wide  
432 open water area, to restrict gene flow between populations on opposite shores. However, those  
433 pairs of populations only deviated from IBD patterns when we restricted analyses to sampling  
434 sites around the Hudson Strait area. In other words, the effect of Hudson Strait as a barrier to  
435 gene flow could only be observed at a regional scale. Differentiation between populations  
436 separated by the Hudson Strait was lower than, for example, pairwise  $F_{ST}$  between populations  
437 in western and eastern Ungava Bay, despite those populations being connected by a near-shore  
438 migration route. We cannot exclude the possibility of other barriers to gene flow in our study  
439 area, as inhospitable coastal habitats have been found to act as barriers to migration along the  
440 shore in anadromous Brown Trout (*Salmo trutta*; Quéméré et al., 2015). Alternatively,  
441 differentiation in the Ungava Bay could be also be driven by the admixture of the Arctic and  
442 Atlantic lineages in the eastern sampling sites (Moore et al., 2015; Salisbury et al. 2019), while  
443 populations on either side of Hudson Strait could share ancestral polymorphism rather than

444 exhibit contemporary gene flow. In this way, our results hint again at the relative importance of  
445 glacial lineages over contemporary restrictions to gene flow in this recently recolonized area.

446 Arctic Char is known for its higher straying rates than other salmonids, but many studies  
447 argue that this dispersal does not necessarily lead to gene flow, as individuals are more prone to  
448 straying when overwintering than when breeding (Moore et al., 2013; Moore et al. 2017; Sévigny,  
449 Harris, Normandeau, Cayuela, Gilbert & Moore, in prep). This case of reproductive isolation with  
450 migration could explain our clustering results for some pairs of sites sharing an estuary. In  
451 sampling sites around Deception Bay (BDE) and Hopes Advance Bay (HAB), individuals with a high  
452 probability of membership to two subgroups were independently distributed in tributary rivers.  
453 As expected, this was not the case with the pair of sampling sites in Labrador, where individuals  
454 were sampled at a juvenile stage and did not have the chance to stray yet. In another more  
455 surprising case, there was no signs of adult dispersers between the Leaf River (FEU) and the  
456 Bérard River (BER), which also share an estuary. Interestingly, those two rivers are on either side  
457 of the limit of two major geological provinces (Thériault & Beauséjour, 2012). The Leaf River, in  
458 the Superior Province, sits on plutonic rocks of the Neoproterozoic era (2,800 to 2,500 million years  
459 BP), while the Bérard River, in the Churchill Province, sits on the sedimentary, volcanic, and more  
460 ferrous rocks of the Labrador Trough, dated to the Paleoproterozoic (2,500 to 1,600 millions  
461 years BP). As salmonids are thought to use their olfaction to recognize their natal rivers (Keefer  
462 & Caudill, 2014), the distinct geologies of the Leaf and Bérard systems could limit straying.  
463 Outside this specific case, our results highlight the limitations for assessing fine-scale Arctic Char  
464 population structure when sampling non-breeding adults.

### 465 4.3 Genomic evidence for local adaptation

466 We explored how genetic variation in Arctic Char was linked to a range of climatic and  
467 physical environmental predictors in both marine and freshwater habitats, something that has  
468 rarely been done in salmonids. Through a constrained ordination, we found that environmental  
469 variables in both habitats independently explained significant proportions of the genetic  
470 variation, even when correcting for spatial patterns expected to be linked to neutral variation.  
471 While different GEA methods identified candidate SNPs with every environmental component  
472 considered, we found that the best-supported candidates were mainly associated with the  
473 components reflecting summer SST, tides, and turbidity (M1), as well as air temperature during  
474 summer (F2).

475 Several studies have found temperature to be a driver of genetic structure and local  
476 adaptation in salmonids, with most studies focusing on freshwater temperatures (Dionne et al.,  
477 2008; Bourret et al., 2013; Perrier et al. 2017; Silvester et al. 2018). However, SST near the mouth  
478 of spawning river was found to be correlated with migration time in species of Pacific salmon  
479 (Kovach, Ellison, Pyare & Tallmon, 2015) and to phenology-related genes in Arctic Char (Madsen  
480 et al., 2019). In our study, the air temperature gradient was latitudinal, while SST varied with  
481 longitude, and different candidate SNPs were identified on marine and freshwater axes of  
482 variation related to temperature. This is expected given that temperature in freshwater and  
483 marine habitats causes selective pressures on different life stages. For example, survival rates of  
484 fertilized eggs were lower when exposed to non-natal temperature conditions in Atlantic Salmon  
485 (Hendry et al., 1998) and Chum Salmon (*Oncorhynchus keta*; Beacham & Murray, 1986). In  
486 contrast, selective pressures in marine habitats have been argued to be weaker since observed

487 mortality rates are lower at sea (Garcia de Leaniz et al., 2007; Quinn, 2005). Furthermore, Spares  
488 et al. (2012) maintained that Arctic Char's diving behavior in Frobisher Bay (Nunavut) could be  
489 linked to optimal digestion temperature, suggesting behavioral thermoregulation, a plastic  
490 response that could limit local adaptation to temperature (Buckley, Ehrenberger & Angilletta,  
491 2015). Nevertheless, Harris et al. (2020) showed seasonality in Arctic Char diving behavior that  
492 followed the warming of surface waters in Cambridge Bay (Nunavut), but little year-to-year  
493 variation in thermal habitat use despite annual differences in climatic conditions, which could  
494 suggest limited plasticity. Sampling sites across our study area displayed considerably different  
495 SST conditions: while coastal waters surrounding sampling sites in Hudson Bay reached mean  
496 summer SSTs ranging from 5.5 – 7.5°C, Hudson Strait stayed closer to the freezing point (0.5 –  
497 2°C). Such contrasts in surface temperature, coupled with a discrepancy in tidal regimes, likely  
498 produce widely different coastal habitats, which we argue could result in local adaptation of  
499 Arctic Char populations.

500 Our GEA results also identified candidate SNPs linked to the environmental component  
501 related to salinity, a factor that has a major impact on the capacity of Arctic Char to use marine  
502 habitats (Spares et al., 2012). In our study area, mean annual salinity was highest at Hudson Strait  
503 sampling sites (30-32 PSU) and lowest in Ungava Bay (21-26 PSU). It is debated whether low  
504 marine temperatures or high salinity is the main reason why Arctic Char must migrate annually  
505 to spend winter in fresh water (Bystriansky, Frick, Richards, Schulte & Ballantyne, 2007). Jensen  
506 and Rickardsen (2008) noted, however, that some Arctic Chars in northern Norway are able to go  
507 back to estuarine waters during winter, surviving salinities over 30 PSU. Accordingly, Larsen et al.  
508 (2008) found differential expression of candidate genes for salinity tolerance among populations



509 of winter migrating anadromous Brown Trout, which suggests that adaptation to salinity is  
510 associated with gene regulation. Moreover, many studies showed that landlocked Arctic Char  
511 populations, which lost access to the sea since their recolonization of freshwater habitat, have  
512 lost the ability to tolerate seawater (e.g. Eliassen et al., 1998; Bystriansky et al., 2007). Salinity  
513 can thus act as a strong selective pressure by restraining foraging to coastal environments.

514         Some recent studies of local adaptation in salmonids have focused on tributary-specific  
515 variation in freshwater conditions within a single catchment, (e.g. the Columbia River; Hand et  
516 al., 2016; Hecht et al., 2015, Micheletti et al., 2018). However, the freshwater environmental  
517 factors used in our study are catchment-based and could limit our interpretations. This is due to  
518 sampling having been carried out during the upstream migration, which prevents us from  
519 knowing the precise spawning site or overwintering lake used by the sampled individuals. In  
520 marine systems, genomic evidence for local adaptation and isolation-by-environment has been  
521 found both at local scales in heterogeneous habitats (e.g. Lenhert et al., 2019; Miller et al., 2019)  
522 and over large geographic distances (e.g. Clucas, Lou, Therkildsen & Kovach, 2019). Arctic Char is  
523 expected to use preferred habitats based on temperature, salinity, and prey availability (Spares  
524 et al., 2012, 2015; Harris et al. 2020). As we averaged near-shore marine conditions around river  
525 mouths, this study is limited to broad-scale environmental heterogeneity, which is in line with  
526 Fraser et al. (2011), who suggest that local adaptation of anadromous salmonids to the marine  
527 environment should occur at a larger spatial scale than in fresh water.

528         No matter the geographic scale being studied, an ideal sampling design for detecting local  
529 adaptation should maximize the environmental variation while minimizing its collinearity with  
530 neutral genetic patterns. For example, Lotterhos and Whitlock (2015) suggest sampling pairs of

531 populations with similar ancestry and contrasting environments. Such a design is suitable when  
532 studying variables that may change drastically over short distances, (e.g. catchment area and  
533 upstream migration distances). However, climatic and physicochemical conditions experienced  
534 by geographically close populations of Arctic Char are more likely to be similar than in distant  
535 ones. Similar considerations were discussed in Nadeau, Meirmans, Aitken, Ritland and Isabel  
536 (2016), where patterns of isolation-by-distance, isolation-by-environment, and isolation-by-  
537 colonization were hard to disentangle for two pine species in a recently recolonized range. In our  
538 study, inspection of genotypes for GEA candidates (Figure S7) reveals that at least some have  
539 varying allele frequencies that follow spatial patterns reminiscent of the neutral structure we  
540 described earlier, especially when environmental variation followed a longitudinal gradient. In  
541 some of those cases, it is possible that a GEA was detected even though neutral processes could  
542 better explain the distribution of the observed allele frequencies. For example, the introgression  
543 of the Arctic glacial lineage in the eastern part of the study area (Moore et al. 2015, Salisbury et  
544 al. 2019) could also have led to divergence due to drift during the LGM to be falsely identified as  
545 linked to environmental variation (e.g. Figure 8A). Alternatively, if colonization of Hudson Bay did  
546 occur by rapid demographic expansion as we discussed earlier, allele-surfing events, where a  
547 mutation can reach high frequency by chance alone (Edmonds, Lile & Cavalli, 2004), could explain  
548 differential allele frequencies, regardless of whether they are adaptive or not (e.g. Figure 8C).  
549 Nonetheless, local adaptation can also contribute to genetic structure across contrasting  
550 environments, e.g. by selecting against maladapted migrants (Wang & Barburd, 2014), and we  
551 found a significant part of genetic variation to be explained jointly by environmental variation

552 and spatial patterns, as well as by environment alone. In that sense, local adaptation in the  
553 system studied here could reinforce the neutral structure discussed earlier.

554 Evidence for local adaptation was detected using three GEA methods, but the overlap of  
555 candidates across methods was relatively low (respectively 14.4%, 14.9% and 26.5% of RDA,  
556 LFMM and Baypass candidates were detected by at least one other method). While the  
557 combination of methods is often used to mitigate false-positive rate, Forester et al. (2018) argued  
558 that this approach is biased toward detection of strong selective sweeps. Accordingly, the  
559 univariate GEA methods (LFMM, Baypass) used here individually identified genomic regions  
560 dense in SNPs associated with environmental component (Figure S9, S10). However, candidate  
561 markers, especially those identified by a multivariate RDA (Figure S11), were also distributed  
562 across most linkage groups and many genomic regions, which fits with the expectation of  
563 adaptation being mainly shaped by polygenic traits (Wellenreuther & Hansson, 2016). This  
564 expectation would apply particularly in the case of rapid adaptation (Barton & Keightley, 2002),  
565 which would be expected given the recent establishment of the Arctic Char populations studied  
566 here (Moore et al., 2015). In our study, different approaches to gene-environment association  
567 seem to highlight distinct signal of adaptation. We therefore suggest that the use of multiple GEA  
568 methods could not only serve to augment confidence in candidates, but also paint a more  
569 complete picture of different evolutionary mechanisms.

#### 570 1.6.4 Implications for conservation and management

571 With the increasing availability of genomic data, it has become common practice to define  
572 management and conservation units based on neutral genetic structure while also accounting  
573 for local adaptation (Funk et al., 2012). Since Arctic Char populations in Nunavik support mainly

574 small-scale subsistence fisheries, stocks are managed on a river-by-river basis, on the premise  
575 that each river contains a single and distinct population (Johnson, 1980). However, our results  
576 add to the evidence for the prevalence of mixed stocks of Arctic Char in adjacent rivers (Boguski,  
577 Gallagher, Howland & Harris, 2016; Moore, Lewis & Tallman, 2014; Moore et al., 2017). While  
578 most pairs of sampled rivers sharing an estuary had very low genetic differentiation, we found  
579 evidence of substructure within those systems, suggesting that genomic tools could be used for  
580 stock assignment of adult fish (e.g. Meek et al., 2016; Moore et al. 2017). The evidence we found  
581 for local adaptation to marine environments is in concordance with the neutral genetic structure  
582 at a broader scale, as major oceanographic basins around Nunavik are contrasted both in their  
583 environments and ancestry of their Arctic Char populations. We therefore suggest that this  
584 species could be managed on a regional basis in Hudson Bay, Hudson Strait, and Ungava Bay, as  
585 it may already be the case, with distinction of the eastern and western coasts in Ungava Bay.

586         There is growing interest in Arctic Char hatchery projects in Nunavik, both for  
587 supplementation and reintroduction of Arctic Char in traditional fishing locations (George, 2007;  
588 Rogers, 2015). The genetic information gathered here could be of great use for those initiatives,  
589 and the adaptive variation explored in this study highlight the need for careful choices of source  
590 populations for broodstocks, as maladapted domesticated individuals can waste efforts and  
591 resources, in addition of likely being detrimental to wild populations (Fraser, Minto, Calvert,  
592 Eddington & Hutchings, 2010; Tymchuk, Biagi, Withler & Devlin, 2005).

593         As the Arctic warms at a greater pace than any other regions on earth (Cohen et al., 2014),  
594 there might be concern about the response of Arctic Char populations to their changing  
595 environment. Traits that are currently optimally adaptive in the present environment could

596 eventually become maladaptive. Species will thus likely need to shift their distributions poleward  
597 and/or will depend on the presence of appropriate genetic diversity/phenotypic plasticity to  
598 adapt and persist in their current distribution. A temporal study recently showed that Arctic Char  
599 populations in Greenland have exhibited stable genetic structure over the last 60 years in face of  
600 rapid climate change, and argued that gene flow, although low, could allow for a modest level of  
601 evolutionary rescue in the short term (Christensen, Jacobsen, Nygaard & Hansen, 2018). Our  
602 study shows potential for local adaptation of Arctic Char populations to both their marine and  
603 freshwater habitats. As changes in climate might operate at a different pace, scale, and stability  
604 in marine and terrestrial ecosystems (Burrows et al., 2011), there is a need for continued research  
605 about the interaction of selective pressures over the lifespan of anadromous organisms.

## 606 **Acknowledgements**

607         This study was funded as part of the BriGHT project (Bridging the Global change, Inuit  
608 Health and the Transforming Ocean) by Sentinel North through the Canada First Research  
609 Excellence Fund. We thank the logistical support of Ministère des Forêts, de la Faune et des Parcs  
610 du Québec and Imalirijit Science Landcamp. We are especially grateful to L. Beaupré (MFFP), G.  
611 Fortin (Laval University) and L. Tran (Makivik Corporation) for the coordination of sampling. We  
612 would also like to thank our numerous partners in the northern villages of Inukjuak, Akulivik,  
613 Ivujivik, Salluit, Quaqaq, Kangirsuk, Aupaluk, Tasiujaq, and Kangiqsualujuaq for their hospitality,  
614 knowledge, and logistic support. Nakurmiik! We also thank I. Caza-Allard for her help regarding  
615 labwork, as well as H. Cayuela, Y. Dorant, A.-L. Ferchaud, M. Laporte and K. Wellband for support  
616 with genomic analyses.

## 617 **References**

- 618 Abed, A., Légaré, G., Pomerleau, S., St-Cyr, J., Boyle, B., & Belzile, F. J. (2019). Genotyping-by-Sequencing  
619 on the Ion Torrent Platform in Barley. *Methods in Molecular Biology*, 1900, 233–252.  
620 [http://doi.org/10.1007/978-1-4939-8944-7\\_15](http://doi.org/10.1007/978-1-4939-8944-7_15)
- 621 Alexander, D. H., Novembre, J., & Lange, K. (2009). Fast model-based estimation of ancestry in unrelated  
622 individuals. *Genome Research*, 19(9), 1655–1664. <http://doi.org/10.1101/gr.094052.109>
- 623 Aljanabi, S., & Martinez, I. (1997). Universal and rapid salt-extraction of high quality genomic DNA for PCR-  
624 based techniques. *Nucleic Acids Research*, 25(22), 4692–4693.  
625 <http://doi.org/10.1093/nar/25.22.4692>
- 626 April, J., Hanner, R. H., Mayden, R. L., & Bernatchez, L. (2013). Metabolic rate and climatic fluctuations  
627 shape continental wide pattern of genetic divergence and biodiversity in fishes. *PlosOne*. 8(7):  
628 e70296. <http://doi.org/10.1371/journal.pone.0070296>
- 629 Assis, J., Tyberghein, L., Bosch, S., Verbruggen, H., Serrão, E. A., & De Clerck, O. (2018). Bio-ORACLE v2.0:  
630 Extending marine data layers for bioclimatic modelling. *Global Ecology and Biogeography*, 27(3),  
631 277–284. <http://doi.org/10.1111/geb.12693>
- 632 Barth, J. M. I., Berg, P. R., Jonsson, P. R., Bonanomi, S., Corell, H., Hemmer-Hansen, J., Jakobsen, K. S.,  
633 Johannesson, K., Jorde, P. E., Knutsen, H. Moksnes, P.-O., Star, B., Stenseth, N. C., Svedäng, H., Jentoft,  
634 S., & André, C. (2017). Genome architecture enables local adaptation of Atlantic cod despite high  
635 connectivity. *Molecular Ecology*, 26(17), 4452–4466. <http://doi.org/10.1111/mec.14207>
- 636 Barton, K. (2019, April 9). Package ‘MuMIn’. Retrieved from [https://cran.r-](https://cran.r-project.org/web/packages/MuMIn/MuMIn.pdf)  
637 [project.org/web/packages/MuMIn/MuMIn.pdf](https://cran.r-project.org/web/packages/MuMIn/MuMIn.pdf)
- 638 Barton, N. H., & Keightley, P. D. (2002). Understanding quantitative genetic variation. *Nature Reviews*  
639 *Genetics*, 3(1), 11–21.
- 640 Bates, D., Maechler, M., Bolker, B., Walker, S., Christensen, R. H. B. (2016, April 16). Package ‘lme4’.  
641 Retrieved from: <https://cran.microsoft.com/snapshot/2016-08-05/web/packages/lme4/lme4.pdf>.
- 642 Bay, L. K., & Caley, M. J. (2011). Greater genetic diversity in spatially restricted coral reef fishes suggests  
643 secondary contact among differentiated lineages. *Diversity*, 3(3), 483–502.  
644 <https://doi.org/10.3390/d3030483>
- 645 Beacham, T. D., & Murray, C. B. (1986). Comparative Development Biology of Chum Salmon  
646 (*Oncorhynchus keta*) from the Fraser River. *Canadian Journal of Fisheries and Aquatic Sciences*, 43,  
647 252–262. <https://doi.org/10.1139/f86-032>
- 648 Bernatchez, L., & Dodson, J. J. (1990). Allopatric origin of sympatric populations of lake whitefish  
649 (*Coregonus clupeaformis*) as revealed by mitochondrial DNA restriction analysis. *Evolution*. 44: 1263–  
650 1271. <https://doi.org/10.1111/j.1558-5646.1990.tb05230.x>
- 651 Bernatchez, L., Wellenreuther, M., Araneda, C., Ashton, D. T., Barth, J. M. I., Beacham, T. D., Maes, G. E.,  
652 Martinsohn, J. T., Miller, K. M., Naish, K., Ovenden, J. R., Primmer, C. R., Suk, H. Y., Therkildsen, N. O.,  
653 & Withler, R. E. (2017). Harnessing the power of genomics to secure the future of seafood. *Trends in*  
654 *Ecology and Evolution*, 32, 665–680. <http://doi.org/10.1016/j.tree.2017.06.010>
- 655 Bernatchez, L., & Wilson, C. C. (1998). Comparative phylogeography of Nearctic and Palearctic fishes.  
656 *Molecular Ecology*, 7(4), 431–452. <http://doi.org/10.1046/j.1365-294x.1998.00319.x>
- 657 Black, B. A., von Biela, V. R., Zimmerman, C. E., & Brown, R. J. (2013). Lake trout otolith chronologies as  
658 multidecadal indicators of high-latitude freshwater ecosystems. *Polar Biology*, 36(1), 147–153.  
659 <http://doi.org/10.1007/s00300-012-1245-9>
- 660 Boguski, D. A., Gallagher, C. P., Howland, K. L., & Harris, L. N. (2016). Genetic stock identification and  
661 mixed-stock fishery analysis of Arctic Char (*Salvelinus alpinus*) in Darnley Bay, Northwest Territories.

- 662 Fisheries and Ocean Canada. <http://www.dfo-mpo.gc.ca/csas-sccs/Publications/ResDocs->  
663 [DocRech/2015/2015\\_023-eng.html](http://www.dfo-mpo.gc.ca/csas-sccs/Publications/ResDocs-DocRech/2015/2015_023-eng.html)
- 664 Bourret, V., Dionne, M., Kent, M. P., Lien, S., & Bernatchez, L. (2013). Landscape genomics in atlantic  
665 salmon (*Salmo salar*): searching for gene-environment interactions driving local adaptation.  
666 *Evolution*, 67(12), 3469–3487. <http://doi.org/10.1111/evo.12139>
- 667 Bradbury, I. R., Hamilton, L. C., Dempson, B., Robertson, M. J., Bourret, V., Bernatchez, L., & Verspoor, E.  
668 (2015). Transatlantic secondary contact in Atlantic Salmon, comparing microsatellites, a single  
669 nucleotide polymorphism array and restriction-site associated DNA sequencing for the resolution of  
670 complex spatial structure. *Molecular Ecology*, 24(20), 5130–5144.  
671 <http://doi.org/10.1111/mec.13395>
- 672 Brunner, P. C., Douglas, M. R., Osinov, A., Wilson, C. C., & Bernatchez, L. (2001). Holarctic Phylogeography  
673 of Arctic Charr (*Salvelinus alpinus* L.) Inferred From Mitochondrial DNA Sequences. *Evolution*, 55(3),  
674 573–586. <http://doi.org/10.1111/j.0014-3820.2001.tb00790.x>
- 675 Buckley, L. B., Ehrenberger, J. C., & Angilletta, M. J. (2015). Thermoregulatory behaviour limits local  
676 adaptation of thermal niches and confers sensitivity to climate change. *Functional Ecology*, 29(8),  
677 1038–1047. <http://doi.org/10.1111/1365-2435.12406>
- 678 Burrows, M. T., Schoeman, D. S., Buckley, L. B., Moore, P., Poloczanska, E. S., Brander, K. M., Brown, C.,  
679 Bruno, J. F., Duarte, C. M., Halpern, B. S., Holding, J., Kappel, C. V., Kiessling, W., O'Connor, M. I.,  
680 Pandolfi, J. M., Parmesan, C., Schwing, F. B., Sydeman, W. J., & Richardson, A. J. (2011). The pace of  
681 shifting climate in marine and terrestrial ecosystems. *Science*, 334(6056), 652–655.  
682 <http://doi.org/10.1126/science.1210288>
- 683 Bystriansky, J. S., Frick, N. T., Richards, J. G., Schulte, P. M., & Ballantyne, J. S. (2007). Failure to up-regulate  
684 gill Na<sup>+</sup>,K<sup>+</sup>-ATPase  $\alpha$ -subunit isoform  $\alpha$ 1b may limit seawater tolerance of land-locked Arctic char  
685 (*Salvelinus alpinus*). *Comparative Biochemistry and Physiology - A Molecular and Integrative*  
686 *Physiology*, 148(2), 332–338. <http://doi.org/10.1016/j.cbpa.2007.05.007>
- 687 Cauwelier, E., Verspoor, E., Coulson, M. W., Armstrong, A., Knox, D., Stradmeyer, L., ... Gilbey, J. (2018).  
688 Ice sheets and genetics: Insights into the phylogeography of Scottish Atlantic salmon, *Salmo salar* L.  
689 *Journal of Biogeography*, 45(1), 51–63. <http://doi.org/10.1111/jbi.13097>
- 690 Caye, K., Jumentier, B., Lepeule, J., & François, O. (2019). LFMM 2: Fast and accurate inference of gene-  
691 environment associations in genome-wide studies. *Molecular Biology and Evolution*, 36(4), 852–860.  
692 <http://doi.org/10.1093/molbev/msz008>
- 693 Christensen, C., Jacobsen, M. W., Nygaard, R., & Hansen, M. M. (2018). Spatiotemporal genetic structure  
694 of anadromous Arctic char (*Salvelinus alpinus*) populations in a region experiencing pronounced  
695 climate change. *Conservation Genetics*, 19(3), 687–700. <http://doi.org/10.1007/s10592-018-1047-x>
- 696 Christensen, K., Rondeau, E., Minkley, D., Leong, J., Nugent, C., Danzmann, R., Ferguson, M. M., Stadnik,  
697 A, Devlin R. H., Muzzerall, R., Edwards, M., Davidson W. S., & Koop B. F. (2018). The Arctic charr  
698 (*Salvelinus alpinus*) genome and transcriptome. *PLoS ONE*, 13(9), 1–30.  
699 <http://doi.org/10.1371/journal.pone.0204076>
- 700 Clarke, R. T., Rothery, P., & Raybould, A. F. (2002). Confidence limits for regression relationships between  
701 distance matrices: Estimating gene flow with distance. *Journal of Agricultural, Biological, and*  
702 *Environmental Statistics*, 7(3), 361–372. <http://doi.org/10.1198/108571102320>
- 703 Clucas, G. V., Lou, R. N., Therkildsen, N. O., & Kovach, A. I. (2019). Novel signals of adaptive genetic  
704 variation in northwestern Atlantic cod revealed by whole-genome sequencing. *Evolutionary*  
705 *Applications*, 12(10), 1971–1987. <http://doi.org/10.1111/eva.12861>
- 706 [Cohen, J., Screen, J. A., Furtado, J. C., Barlow, M., Whittleston, D., Coumou, D., Francis, J., Dethloff, K.,](http://doi.org/10.1111/eva.12861)  
707 [Entekhabi, D., Overland, J., & Jones, J. \(2014\). Recent Arctic amplification and extreme mid-latitude](http://doi.org/10.1111/eva.12861)  
708 [weather. \*Nature geoscience\*, 7\(9\), 627–637. <https://doi.org/10.1038/ngeo2234>](http://doi.org/10.1111/eva.12861)

- 709 Crête-Lafrenière, A., Weir, L. K., & Bernatchez, L. (2012). Framing the salmonidae family phylogenetic  
710 portrait: a more complete picture from increased taxon sampling. *Plos One*, 7: e46662.  
711 <https://doi.org/10.1371/journal.pone.0046662>
- 712 Dempson, J. B., & Kristofferson, A. H. (1987). Spatial and Temporal Aspects of the Ocean Migration of  
713 Anadromous Arctic Char. *American Fisheries Society Symposium*, 1, 340–357.
- 714 Do, C., Waples, R. S., Peel, D., Macbeth, G. M., Tillett, B. J., & Ovenden, J. R. (2014). NeEstimator v2: Re-  
715 implementation of software for the estimation of contemporary effective population size (Ne) from  
716 genetic data. *Molecular Ecology Resources*, 14(1), 209–214. [http://doi.org/10.1111/1755-  
717 0998.12157](http://doi.org/10.1111/1755-0998.12157)
- 718 Dray, S. Bauman, D., Blanchet, G. Borcard, D., Clappe, S., Geunard, G., Jombart, T., Larocque, G., Legendre,  
719 P., Madi, N., & Wagner, H. H. (2020, February 6). Package ‘adespatial’. Retrieved from  
720 <https://cran.microsoft.com/web/packages/adespatial/adespatial.pdf>
- 721 Dyke, A. S. (2004). An outline of North American deglaciation with emphasis on central and northern  
722 Canada. *Developments in Quaternary Sciences*, 2B, 373–424. [https://doi.org/10.1016/S1571-  
723 0866\(04\)80209-4](https://doi.org/10.1016/S1571-0866(04)80209-4)
- 724 Eckert, C. G., Samis, K. E., & Loughheed, S. C. (2008). Genetic variation across species’ geographical ranges:  
725 The central-marginal hypothesis and beyond. *Molecular Ecology*, 17(5), 1170–1188.  
726 <http://doi.org/10.1111/j.1365-294X.2007.03659.x>
- 727 Edmonds, C. A., Lillie, A. S., & Cavalli-Sforza, L. L. (2004). Mutations arising in the wave front of an  
728 expanding population. *Proceedings of the National Academy of Sciences of the United States of  
729 America*, 101(4), 975–979. <http://doi.org/10.1073/pnas.0308064100>
- 730 Eliassen, R. A., Johnsen, H. K., Mayer, I., & Jobling, M. (1998). Contrasts in osmoregulatory capacity of two  
731 Arctic charr, *Salvelinus alpinus* (L.), strains from northern Norway. *Aquaculture*, 168(1–4), 255–269.  
732 [http://doi.org/10.1016/S0044-8486\(98\)00353-6](http://doi.org/10.1016/S0044-8486(98)00353-6)
- 733 Esri Inc. (2019). ArcGIS Pro (Version 2.4.2). Esri Inc. [https://www.esri.com/en-us/arcgis/products/arcgis-  
734 pro/](https://www.esri.com/en-us/arcgis/products/arcgis-pro/).
- 735 Fick, S. E., & Hijmans, R. J. (2017). WorldClim 2: new 1-km spatial resolution climate surfaces for global  
736 land areas. *International Journal of Climatology*, 37(12), 4302–4315. <http://doi.org/10.1002/joc.5086>
- 737 Fraser, D. J., Weir, L. K., Bernatchez, L., Hansen, M. M., & Taylor, E. B. (2011). Extent and scale of local  
738 adaptation in salmonid fishes: review and meta-analysis. *Heredity*, 106(3), 404–420.  
739 <http://doi.org/10.1038/hdy.2010.167>
- 740 Fraser, D. J., Minto, C., Calvert, A. M., Eddington, J. D., & Hutchings, J. A. (2010). Potential for  
741 domesticated-wild interbreeding to induce maladaptive phenology across multiple populations of  
742 wild Atlantic salmon (*Salmo salar*). *Canadian Journal of Fisheries and Aquatic Sciences*, 67(11), 1768–  
743 1775. <http://doi.org/10.1139/F10-094>
- 744 Frichot, E., Schoville, S. D., Bouchard, G., & François, O. (2013). Testing for associations between loci and  
745 environmental gradients using latent factor mixed models. *Molecular Biology and Evolution*, 30(7),  
746 1687–1699. <http://doi.org/10.1093/molbev/mst063>
- 747 Funk, W. C., McKay, J. K., Hohenlohe, P. A., & Allendorf, F. W. (2012). Harnessing genomics for delineating  
748 conservation units. *Trends in Ecology & Evolution*, 27(9), 489–496.  
749 <http://doi.org/10.1038/jid.2014.371>
- 750 Garcia De Leaniz, C., Fleming, I. A., Einum, S., Verspoor, E., Jordan, W. C., Consuegra, S., ... Quinn, T. P.  
751 (2007). A critical review of adaptive genetic variation in Atlantic salmon: Implications for  
752 conservation. *Biological Reviews*, 82(2), 173–211. <http://doi.org/10.1111/j.1469-185X.2006.00004.x>
- 753 Gautier, M. (2015). Genome-wide scan for adaptive divergence and association with population-specific  
754 covariates. *Genetics*, 201(4), 1555–1579. <http://doi.org/10.1534/genetics.115.181453>
- 755 George, J. (2007, October 18). 'We are trying to cheat nature and create a char population from zero.'  
756 *Nunatsiaq News*. Retrieved from



- 757 [https://nunatsiaq.com/stories/article/We\\_are\\_trying\\_to\\_cheat\\_nature\\_and\\_create\\_a\\_char\\_population\\_from\\_zero/](https://nunatsiaq.com/stories/article/We_are_trying_to_cheat_nature_and_create_a_char_population_from_zero/)  
758
- 759 Goodsmann, D. W., Cooke, B., Coltman, D. W., & Lewis, M. A. (2014). The genetic signature of rapid range  
760 expansions: How dispersal, growth and invasion speed impact heterozygosity and allele surfing.  
761 *Theoretical Population Biology*, 98, 1–10. <http://doi.org/10.1016/j.tpb.2014.08.005>
- 762 Grant, W. A. S., & Bowen, B. W. (1998). Shallow population histories in deep evolutionary lineages of  
763 marine fishes: insights from sardines and anchovies and lessons for conservation. *Journal of heredity*,  
764 89(5), 415–426. <https://doi.org/10.1093/jhered/89.5.415>
- 765 Gray J., Lauriol, B., Bruneau, D., & Ricard, J. (1993). Postglacial emergence of Ungava Peninsula, and its  
766 relationship to glacial history. *Canadian Journal of Earth Sciences*, 30, 1676–1696.  
767 <https://doi.org/10.1139/e93-147>
- 768 Gruber, B., Unmack, P. J., Berry, O. F., & Georges, A. (2018). DARTR : An R package to facilitate analysis of  
769 SNP data generated from reduced representation genome sequencing. *Molecular Ecology Resources*,  
770 18, 691–699. <http://doi.org/10.1111/1755-0998.12745>
- 771 Grummer, J. A., Beheregaray, L., Bernatchez, L., Hand, B., Luikart, G., Narum, S. R., Taylor, E. B. (2019).  
772 Aquatic landscape genomics and environmental effects on genetic variation. *Trends in Ecology &*  
773 *Evolution*, 34(7): 641–654. <https://doi.org/10.1016/j.tree.2019.02.013>
- 774 Gulseth, O. A., & Nilssen, K. J. (2001). Life-history traits of charr, *Salvelinus alpinus*, from a high arctic  
775 watercourse on Svalbard. *Arctic*, 54(1), 1–11. <http://doi.org/10.14430/arctic758>
- 776 Günther, T., & Coop, G. (2013). Robust identification of local adaptation from allele frequencies. *Genetics*,  
777 195(1), 205–220. <http://doi.org/10.1534/genetics.113.152462>
- 778 Guo, B., DeFaveri, J., Sotelo, G., Nair, A., & Merilä, J. (2015). Population genomic evidence for adaptive  
779 differentiation in Baltic Sea three-spined sticklebacks. *BMC Biology*, 13(1), 1–18.  
780 <http://doi.org/10.1186/s12915-015-0130-8>
- 781 Guo, B., Li, Z., & Merilä, J. (2016). Population genomic evidence for adaptive differentiation in the Baltic  
782 Sea herring. *Molecular Ecology*, 25(12), 2833–2852. <http://doi.org/10.1111/mec.13657>
- 783 Gyselman, E. C. (1994). Fidelity of Anadromous Arctic Char (*Salvelinus alpinus*) to Nauyuk Lake, N.W.T.,  
784 Canada. *Canadian Journal of Fisheries and Aquatic Sciences*, 51, 1927–1934.
- 785 Hammar, J. (1987). Zoogeographical zonation of fish communities in insular Newfoundland; A preliminary  
786 attempt to use the Arctic char population ecology to describe early postglacial colonization  
787 interactions. In: Proceedings of the fourth ISACF Workshop on Arctic Char, 1986. ISACF :  
788 Drottningholm, Sweden, pp. 31-38.
- 789 Hand, B. K., Muhlfeld, C. C., Wade, A. A., Kovach, R. P., Whited, D. C., Narum, S. R., Matala, A. P.,  
790 Ackerman, M. W., Garner, B. A., Kimball, J. S., Standford, J. A., & Luikart, G. (2016). Climate variables  
791 explain neutral and adaptive variation within salmonid metapopulations: The importance of  
792 replication in landscape genetics. *Molecular Ecology*, 25(3), 689–705.  
793 <http://doi.org/10.1111/mec.13517>
- 794 Harris, L., Yurkowski, D., Gilbert, M., Else, B., Duke, P., Ahmed, M., Tallman, R. F., Fisk, A., & Moore, J.-S.  
795 (2020). Depth and temperature preference of anadromous Arctic Char, *Salvelinus alpinus*, in the  
796 Kitikmeot Sea: a shallow and low salinity area of the Canadian Arctic. *Marine Ecology Progress Series*,  
797 634, 175–197. <http://doi.org/10.3354/meps13195>
- 798 Hendry, A. P., Hensleigh, J. E., & Reisenbichler, R. R. (1998). Incubation temperature, developmental  
799 biology, and the divergence of sockeye salmon (*Oncorhynchus nerka*) within Lake Washington.  
800 *Canadian Journal of Fisheries and Aquatic Sciences*, 55(6), 1387–1394. <http://doi.org/10.1139/f98-020>  
801
- 802
- 803 Hewitt, G. M. (2000). The genetic legacy of the quaternary ice ages. *Nature*, 405(6789), 907–913.  
804 <http://doi.org/10.1038/35016000>

- 805 Jeffreys, H. (1961). *Theory of probability* (3rd Ed.). Oxford, UK: Oxford University Press.
- 806 Jensen, J. L. A., & Rikardsen, A. H. (2008). Do northern riverine anadromous Arctic charr *Salvelinus alpinus*  
807 and sea trout *Salmo trutta* overwinter in estuarine and marine waters? *Journal of Fish Biology*, 73(7),  
808 1810–1818. <http://doi.org/10.1111/j.1095-8649.2008.02042.x>
- 809 Johnson, L. 1980. The Arctic charr, *Salvelinus alpinus*. In E. K. Balon (Ed.), *Charrs, Salmonid Fishes of the*  
810 *Genus Salvelinus* (pp 15-98). The Hague, Netherlands: Springer.
- 811 Jombart, T. (2008). Adegnet: A R package for the multivariate analysis of genetic markers. *Bioinformatics*,  
812 24(11), 1403–1405. <http://doi.org/10.1093/bioinformatics/btn129>
- 813 Kallio-Nyberg, I., Koljonen, M. L., & Saloniemi, I. (2000). Effect of maternal and paternal line on spatial and  
814 temporal marine distribution in Atlantic salmon. *Animal Behaviour*, 60(3), 377–384.  
815 <http://doi.org/10.1006/anbe.2000.1465>
- 816 Kawecki, T. J., & Ebert, D. (2004). Conceptual issues in local adaptation. *Ecology Letters*, 7(12), 1225–1241.  
817 <http://doi.org/10.1111/j.1461-0248.2004.00684.x>
- 818 Keefer, M. L., & Caudill, C. C. (2014). Homing and straying by anadromous salmonids: a review of  
819 mechanisms and rates. *Reviews in fish biology and fisheries*, 24, 333-368.  
820 <http://doi.org/10.1007/s11160-013-9334-6>
- 821 Klemetsen, A., Amundsen, P.-A., Dempson, J. B., Jonsson, B., Jonsson, N., O’Connell, M. F., & Mortensen,  
822 E. (2003). Atlantic salmon *Salmo salar* L., brown trout *Salmo trutta* L. and Arctic charr *Salvelinus*  
823 *alpinus* (L.): a review of aspects of their life histories. *Ecology of Freshwater Fish*, 12(1), 1–59.  
824 <http://doi.org/10.1034/j.1600-0633.2003.00010.x>
- 825 Klemetsen, A. (2010). The Charr Problem Revisited: Exceptional Phenotypic Plasticity Promotes Ecological  
826 Speciation in Postglacial Lakes. *Freshwater Reviews*, 3(1), 49–74. <http://doi.org/10.4290/frj-3.1.3>
- 827 Kondrashov, F. A. (2012). Gene duplication as a mechanism of genomic adaptation to a changing  
828 environment. *Proceedings of the Royal Society B: Biological Sciences*, 279(1749), 5048–5057.  
829 <http://doi.org/10.1098/rspb.2012.1108>
- 830 Kovach, R. P., Ellison, S. C., Pyare, S., & Tallmon, D. A. (2015). Temporal patterns in adult salmon migration  
831 timing across southeast Alaska. *Global Change Biology*, 21(5), 1821–1833.  
832 <http://doi.org/10.1111/gcb.12829>
- 833 Layton, K., Dempson, J., Snelgrove, P., Duffy, S., Messmer, A., Paterson, I., Jeffery, N. W., Kess, T., Horne,  
834 J. B., Salisbury, S. J., Ruzzante, D. E., Bentzen, P., Côté, D., Nugent, C. M., Ferguson, M. M., Leong, J.  
835 S., Koop, B. F., & Bradbury, I. (2020). Resolving fine-scale population structure and fishery exploitation  
836 using sequenced microsatellites in a northern fish. *Evolutionary Applications*. Advance Online  
837 Publication. <http://doi.org/10.1111/eva.12922>
- 838 Lee, M. D., Wagenmakers E. (2014). *Bayesian Cognitive Modeling: A Practical Course*. Cambridge, UK:  
839 Cambridge University Press.
- 840 Legendre, P., & Gallagher, E. D. (2001). Ecologically meaningful transformations for ordination of species  
841 data. *Oecologia*, 129(2), 271–280. <http://doi.org/10.1007/s004420100716>
- 842 Length, R. (2020, January 28). Package ‘emmeans’. Retrieved from [https://cran.r-](https://cran.r-project.org/web/packages/emmeans/emmeans.pdf)  
843 [project.org/web/packages/emmeans/emmeans.pdf](https://cran.r-project.org/web/packages/emmeans/emmeans.pdf).
- 844 Lehnert, S. J., Dibacco, C., Wyngaarden, M. Van, Jeffery, N. W., Lowen, J. Ben, Sylvester, E. V. A., Wringe,  
845 B. F., Stanley, R. R. E., Hamilton, L. C., & Bradbury, I. R. (2019). Fine-scale temperature-associated  
846 genetic structure between inshore and offshore populations of sea scallop (*Placopecten*  
847 *magellanicus*). *Heredity*, 122, 69–80. <http://doi.org/10.1038/s41437-018-0087-9>
- 848 Li, H., & Durbin R. (2009). Fast and accurate short read alignment with Burrows-Wheeler Transform.  
849 *Bioinformatics*, 25, 1754-60. <https://doi.org/10.1093/bioinformatics/btp324>
- 850 Lotterhos, K. E., & Whitlock, M. C. (2015). The relative power of genome scans to detect local adaptation  
851 depends on sampling design and statistical method. *Molecular Ecology*, 24(5), 1031–1046.  
852 <http://doi.org/10.1111/mec.13100>

- 853 Luikart, G., Kardos, M., Hand, B. K., Rajora, O. P., Aitken, S. N., & Hohenlohe, P. A. (2018). Population  
854 Genomics: Advancing Understanding of Nature. In *Population Genomics* (pp. 3–79).  
855 [http://doi.org/10.1007/13836\\_2018\\_60](http://doi.org/10.1007/13836_2018_60)
- 856 Luu, K., Bazin, E., & Blum, M. G. B. (2017). pcadapt: an R package to perform genome scans for selection  
857 based on principal component analysis. *Molecular Ecology Resources*, 17(1), 67–77.  
858 <http://doi.org/10.1111/1755-0998.12592>
- 859 Madsen, R. P. A., Jacobsen, M. W., O'Malley, K. G., Nygaard, R., Præbel, K., Jónsson, B., Pujolar, J. M.,  
860 Fraser, D. J., Bernatchez, L., & Hansen, M. M. (2019). Genetic population structure and variation at  
861 phenology-related loci in anadromous Arctic char (*Salvelinus alpinus*). *Ecology of Freshwater Fish*, 29,  
862 170–183. <http://doi.org/10.1111/eff.12504>
- 863 Mateus, C. S., Almeida, P. R., Mesquita, N., Quintella, B. R., & Alves, M. J. (2016). European lampreys: New  
864 insights on postglacial colonization, gene flow and speciation. *PLoS ONE*, 11(2), 1–22.  
865 <http://doi.org/10.1371/journal.pone.0148107>
- 866 Meek, M. H., Baerwald, M. R., Stephens, M. R., Goodbla, A., Miller, M. R., Tomalty, K. M. H., & May, B.  
867 (2016). Sequencing improves our ability to study threatened migratory species: Genetic population  
868 assignment in California's Central Valley Chinook salmon. *Ecology and Evolution*, 6(21), 7706–7716.  
869 <http://doi.org/10.1002/ece3.2493>
- 870 Meirmans, P. G., & Van Tienderen, P. H. (2004). GENOTYPE and GENODIVE: Two programs for the analysis  
871 of genetic diversity of asexual organisms. *Molecular Ecology Notes*, 4(4), 792–794.  
872 <http://doi.org/10.1111/j.1471-8286.2004.00770.x>
- 873 Micheletti, S. J., Matala, A. R., Matala, A. P., & Narum, S. R. (2018). Landscape features along migratory  
874 routes influence adaptive genomic variation in anadromous steelhead (*Oncorhynchus mykiss*).  
875 *Molecular Ecology*, 27, 128–145. <http://doi.org/10.1111/mec.14407>
- 876 Miller, A. D., Hoffmann, A. A., Tan, M. H., Young, M., Ahrens, C., Cocomazzo, M., ... Sherman, C. D. H.  
877 (2019). Local and regional scale habitat heterogeneity contribute to genetic adaptation in a  
878 commercially important marine mollusc (*Haliotis rubra*) from southeastern Australia. *Molecular*  
879 *Ecology*, (November 2018), 3053–3072. <http://doi.org/10.1111/mec.15128>
- 880 Moore, J. W. (1975). Reproductive biology of anadromous arctic char, *Salvelinus alpinus* (L.), in the  
881 Cumberland Sound area of Baffin Island. *Journal of Fish Biology*, 7(2), 143–151.  
882 <http://doi.org/10.1111/j.1095-8649.1975.tb04584.x>
- 883 Moore, J.-S., Bajno, R., Reist, J. D., & Taylor, E. B. (2015). Post-glacial recolonization of the North American  
884 Arctic by Arctic char (*Salvelinus alpinus*): Genetic evidence of multiple northern refugia and  
885 hybridization between glacial lineages. *Journal of Biogeography*, 42(11), 2089–2100.  
886 <http://doi.org/10.1111/jbi.12600>
- 887 Moore, J.-S., Harris, L. N., Kessel, S. T., Bernatchez, L., Tallman, R. F., & Fisk, A. T. (2016). Preference for  
888 near-shore and estuarine habitats in anadromous Arctic char (*Salvelinus alpinus*) from the Canadian  
889 high Arctic (Victoria Island, NU) revealed by acoustic telemetry. *Canadian Journal of Fisheries and*  
890 *Aquatic Sciences*, 73, 1434–1445. <https://doi.org/10.1139/cjfas-2015-0436>
- 891 Moore, J.-S., Harris, L. N., Le Luyer, J., Sutherland, B., Rougemont, Q., Tallman, R. F., ... Bernatchez, L.  
892 (2017). Genomics and telemetry suggest a role for migration harshness in determining overwintering  
893 habitat choice, but not gene flow, in anadromous Arctic Char. *Molecular Ecology*, 1–14.  
894 <http://doi.org/10.1002/mrd.22357>
- 895 Moore, J.-S., Harris, L. N., Kessel, S. T., Bernatchez, L., Tallman, R. F., & Fisk, A. T. (2016). Preference for  
896 near-shore and estuarine habitats in anadromous Arctic char (*Salvelinus alpinus*) from the Canadian  
897 high Arctic (Victoria Island, NU) revealed by acoustic telemetry. *Canadian Journal of Fisheries and*  
898 *Aquatic Sciences*, 53(9), 1689–1699. <http://doi.org/10.1017/CBO9781107415324.004>
- 899 Moore, J.-S., Harris, L. N., Tallman, R. F., & B, T. E. (2013). The interplay between dispersal and gene flow  
900 in anadromous Arctic char (*Salvelinus alpinus*): implications for potential for local adaptation.

- 901 *Canadian Journal of Fisheries and Aquatic Sciences*, 70(9). 1327–1338. Retrieved from  
902 <http://www.nrcresearchpress.com/doi/abs/10.1139/cjfas-2013-0138>
- 903 Moore, J.-S., Lewis, C., & Tallman, R. F. (2014). Population structure, genetic diversity, and dispersal of  
904 anadromous Arctic Char (*Salvelinus alpinus*) in Frobisher Bay, Nunavut, inferred from microsatellite  
905 markers. *Fisheries and Ocean Canada*.  
906 <https://pdfs.semanticscholar.org/3d9a/2698b30559aa57f2794076b6af8ac5cb6897.pdf?ga=2.66399022.1402800977.1584041366-316585798.1574895993>
- 907 Nadeau, S., Meirmans, P. G., Aitken, S. N., Ritland, K., & Isabel, N. (2016). The challenge of separating  
908 signatures of local adaptation from those of isolation by distance and colonization history: The case  
909 of two white pines. *Ecology and Evolution*, 6(24), 8649–8664. <http://doi.org/10.1002/ece3.2550>
- 910 Nakagawa, S., & Schielzeth, H. (2013). A general and simple method for obtaining  $R^2$  from generalized  
911 linear mixed-effects models. *Methods in Ecology and Evolution*, 4(2), 133–142.  
912 <http://doi.org/10.1111/j.2041-210x.2012.00261.x>
- 913 Occiotti, S., Parent, M., Lajeunesse, P., Robert, F. & Govare, É. (2011). Late Pleistocene–Early Holocene  
914 Decay of the Laurentide Ice Sheet in Québec–Labrador. *Developments in Quaternary Sciences*, 15,  
915 601–630. <http://doi.org/10.1016/B978-0-444-53447-7.00047-7>
- 916 Oksanen, J. (2012). Constrained ordination: tutorial with R and vegan. *R-Package Vegan*, 1–10.
- 917 O’Malley, K. G., Vaux, F., & Black, A. N. (2019). Characterizing neutral and adaptive genomic differentiation  
918 in a changing climate: The most northerly freshwater fish as a model. *Ecology and Evolution*, 9(4),  
919 2004–2017. <http://doi.org/10.1002/ece3.4891>
- 920 Pante, E., & Simon-Bouhet, B. (2013). marmap: A Package for Importing, Plotting and Analyzing  
921 Bathymetric and Topographic Data in R. *PLoS ONE*, 8(9), 6–9.  
922 <http://doi.org/10.1371/journal.pone.0073051>
- 923 Pembleton, L. W., Cogan, N. O. I., & Forster, J. W. (2013). StAMPP: An R package for calculation of genetic  
924 differentiation and structure of mixed-ploidy level populations. *Molecular Ecology Resources*, 13(5),  
925 946–952. <http://doi.org/10.1111/1755-0998.12129>
- 926 Peres-Neto, P. R., & Legendre, P. (2010). Estimating and controlling for spatial structure in the study of  
927 ecological communities. *Global Ecology and Biogeography*, 19(2), 174–184.  
928 <http://doi.org/10.1111/j.1466-8238.2009.00506.x>
- 929 Perrier, C., Ferchaud, A.-L., Sirois, P., Thibault, I., & Bernatchez, L. (2017). Do genetic drift and  
930 accumulation of deleterious mutations preclude adaptation? Empirical investigation using RADseq in  
931 a northern lacustrine fish. *Molecular Ecology*, 26, 6317–6335. <http://doi.org/10.1111/mec.14361>
- 932 Peterman, W. E. (2018). ResistanceGA: An R package for the optimization of resistance surfaces using  
933 genetic algorithms. *Methods in Ecology and Evolution*, 9(6), 1638–1647.  
934 <http://doi.org/10.1111/2041-210X.12984>
- 935 Power, G., Pope, G. F., & Coad, B. W. (1973). Postglacial Colonization of the Matamek River, Quebec, by  
936 Fishes. *Journal of the Fisheries Research Board of Canada*, 30(10), 1586–1591.
- 937 Prinsenberg, S. J. (1984). Freshwater contents and heat budgets of James Bay and Hudson Bay. *Continental*  
938 *Shelf Research*, 3(2), 191–200.
- 939 Pritchard, V. L., Mäkinen, H., Vähä, J. P., Erkinaro, J., Orell, P., & Primmer, C. R. (2018). Genomic signatures  
940 of fine-scale local selection in Atlantic salmon suggest involvement of sexual maturation, energy  
941 homeostasis and immune defence-related genes. *Molecular Ecology*, 27(11), 2560–2575.  
942 <http://doi.org/10.1111/mec.14705>
- 943 Quéméré, E., Baglinière, J. L., Roussel, J. M., Evanno, G., McGinnity, P., & Launey, S. (2016). Seascape and  
944 its effect on migratory life-history strategy influences gene flow among coastal brown trout (*Salmo*  
945 *trutta*) populations in the English Channel. *Journal of Biogeography*, 43(3), 498–509.  
946 <http://doi.org/10.1111/jbi.12632>
- 947

- 948 Quinlan, A. R. (2014). BEDTools: the Swiss-army tool for genome feature analysis. *Current protocols in*  
949 *bioinformatics*, 47(1), 11-12.
- 950 Quinn, T. P. (1993). A review of homing and straying of wild and hatchery-produced salmon. *Fisheries*  
951 *Research*, 18(1–2), 29–44. [http://doi.org/10.1016/0165-7836\(93\)90038-9](http://doi.org/10.1016/0165-7836(93)90038-9)
- 952 Quinn, T. P. 2005. *The Behavior and Ecology of Pacific Salmon and Trout*. Vancouver, Canada: UBC Press.
- 953 Rochette, N. C., Rivera-Colón, A. G., & Catchen, J. M. (2019). Stacks 2: Analytical methods for paired-end  
954 sequencing improve RADseq-based population genomics. *Molecular Ecology*, 28(21), 4737–4754.  
955 <http://doi.org/10.1111/mec.15253>.
- 956 Roff, D. A. (2007). A centennial celebration for quantitative genetics. *Evolution*, 61, 1017–1032.
- 957 Rogers, S. (2015, May 26). Local food production plan aims to feed Nunavik communities. *Nunatsiaq News*.  
958 Retrieved from  
959 [https://nunatsiaq.com/stories/article/65674food\\_production\\_aims\\_to\\_feed\\_nunavik\\_communities](https://nunatsiaq.com/stories/article/65674food_production_aims_to_feed_nunavik_communities)  
960 [/](#)
- 961 Saefken, B, Ruegamer, D., Baumann P. P., & Kruse R. (2019, December 17) Package ‘cAIC4’. Retrieved from  
962 <https://cran.r-project.org/web/packages/cAIC4/cAIC4.pdf>.
- 963 Salisbury, S. J., McCracken, G. R., Keefe, D., Perry, R., & Ruzzante, D. E. (2019). Extensive secondary contact  
964 among three glacial lineages of Arctic Char (*Salvelinus alpinus*) in Labrador and Newfoundland.  
965 *Ecology and Evolution*, 9(4), 2031–2045. <http://doi.org/10.1002/ece3.4893>
- 966 Satterthwaite, F. E. (1946). An approximate distribution of estimates of variance components. *Biometrics*  
967 *Bulletin*, 2(6), 110–114. <http://doi.org/10.1002/9780470057339.vai016>
- 968 Savard, J.-P., Gachon, P., Rosu, C., Aider, R., Martin, P., & Saad, C. (2014). *Impact des changements*  
969 *climatiques sur le régime des tempêtes, les niveaux d'eau et les vagues dans le Nunavik*. Ministère  
970 des Transports du Québec. <http://www.bv.transports.gouv.qc.ca/mono/1161055.pdf>
- 971 Sbrocco, E. J., & Barber, P. H. (2013). MARSPEC: ocean climate layers for marine spatial ecology. *Ecology*,  
972 94(4), 979–979. <http://doi.org/10.1890/12-1358.1>
- 973 Sévigny, M., Harris, L. M., Normandeau, É., Cayuela, H., Gilbert, M. J. H., & Moore, J.-S. (2020). Fine-scale  
974 genetic differentiation between spawning Arctic Char (*Salvelinus alpinus*) sites within a watershed in  
975 Nunavut. Manuscript in preparation.
- 976 Spares, A. D., Stokesbury, M. J. W., Dadswell, M. J., O’Dor, R. K., & Dick, T. A. (2015). Residency and  
977 movement patterns of Arctic charr *Salvelinus alpinus* relative to major estuaries. *Journal of Fish*  
978 *Biology*, 86(6), 1754–1780. <http://doi.org/10.1111/jfb.12683>
- 979 Spares, A. D., Stokesbury, M. J. W., O’Dor, R. K., & Dick, T. A. (2012). Temperature, salinity and prey  
980 availability shape the marine migration of Arctic char, *Salvelinus alpinus*, in a macrotidal estuary.  
981 *Marine Biology*, 159(8), 1633–1646. <http://doi.org/10.1007/s00227-012-1949-y>
- 982 Sylvester, E. V. A., Beiko, R. G., Bentzen, P., Paterson, I., Horne, J. B., Watson, B., Lehnert, S., Duffy, S.,  
983 Clément, M., Robertson, M. J., & Bradbury, I. R. (2018). Environmental extremes drive population  
984 structure at the northern range limit of Atlantic salmon in North America. *Molecular Ecology*, 27(20),  
985 4026–4040. <http://doi.org/10.1111/mec.14849>
- 986 The UniProt Consortium. (2019). UniProt: A worldwide hub of protein knowledge. *Nucleic Acids Research*,  
987 47(D1), D506–D515. <http://doi.org/10.1093/nar/gky1049>
- 988 Tiffin, P., & Ross-Ibarra, J. (2014). Advances and limits of using population genetics to understand local  
989 adaptation. *Trends in Ecology and Evolution*, 29(12), 673–680.  
990 <http://doi.org/10.1016/j.tree.2014.10.004>
- 991 Thériault, R., & Beauséjour, S. (2012). *Carte Géologique du Québec – Edition 2012*. Ministère des  
992 Ressources naturelles du Québec.  
993 <http://gq.mines.gouv.qc.ca/documents/examine/DV201206/DV201206.pdf>
- 994 Torvinen, E. S. (2017). Lake trout (*Salvelinus namaycush*) otoliths as indicators of past climate patterns  
995 and growth in Arctic lakes. [Master’s thesis, University of Alaska Fairbanks]. ScholarWorks@UA

- 996 Turgeon, J., & Bernatchez, L. (2001). Mitochondrial DNA phylogeography of lake cisco (*Coregonus artedii*):  
997 Evidence supporting extensive secondary contacts between two glacial races. *Molecular Ecology*,  
998 10(4), 987–1001. <http://doi.org/10.1046/j.1365-294X.2001.01248.x>  
999 Tymchuk, W. E., Biagi, C., Withler, R., & Devlin, R. H. (2006). Growth and behavioral consequences of  
1000 introgression of a domesticated aquaculture genotype into a native strain of coho salmon.  
1001 *Transactions of the American Fisheries Society*, 135(2), 442–455. <https://doi.org/10.1577/T05-181.1>  
1002 Vaida, F., & Blanchard, S. (2005). Conditional Akaike Information for Mixed-Effects Models. *Biometrika*,  
1003 92(2), 351–370. <https://doi.org/10.1093/biomet/92.2.351>  
1004 Wellband, K., Mérot, C., Linnansaari, T., Elliott, J. A. K., Curry, R. A., & Bernatchez, L. (2019). Chromosomal  
1005 fusion and life history-associated genomic variation contribute to within-river local adaptation of  
1006 Atlantic salmon. *Molecular Ecology*, 28(6), 1439–1459. <https://doi.org/10.1111/mec.14965>  
1007 Wellenreuther, M. & Hansson, B. (2016). Detecting polygenic evolution: problems, pitfalls, and promises.  
1008 *Trends in Genetics*, 32(3), 155-164.  
1009 Williams, G.C. (1966). *Adaptation and Natural Selection*. Princeton, NJ: Princeton University Press.  
1010 Wilson, C. C., Hebert, P. D. N., Reist, J. D., Dempson, J. B., & Dempson, J. B. (1996). Phylogeography and  
1011 postglacial dispersal of arctic charr *Salvelinus alpinus* in North America. *Molecular Ecology*, 5(2), 187–  
1012 197. <http://doi.org/10.1046/j.1365-294X.1996.00265.x>  
1013

## 1014 **Data accessibility**

1015 Raw sequences that support the findings of this study will be openly available on NCBI  
1016 SRA. Due to the current measures of social distancing surrounding COVID-19, the data were  
1017 unreachable and couldn't be uploaded to SRA in time for manuscript submission (end of April  
1018 2020). This will be done upon acceptance of the article.

## 1019 **Author's contribution**

1020 J.-S.M., L.B., J.M., J.-É.T. and X.D. conceived and planned the research. X.D. and J.M. performed  
1021 the sampling, and X.D. and É.N. produced the dataset. X.D., É.N., J.-S.M., L.B. and J.M. contributed  
1022 to the interpretation of the results. X.D. performed most of the analyses and led the writing of  
1023 the manuscript, under the supervision of J.-S.M. All authors provided critical feedback and helped  
1024 shape the research, analysis and manuscript.

1025

**Table 1.** Value range and source of environmental factors considered in gene-environment associations. PCA axis most associated to marine (M1-M3) and freshwater (F1-F3) factors are indicated.

| Variable     | Description                                          | Value range   | Unit                                 | Temporal range | Database   | Source     | PCA axis |
|--------------|------------------------------------------------------|---------------|--------------------------------------|----------------|------------|------------|----------|
| SST_summer   | Mean sea-surface temperature (July to September)     | 0.5 – 6.8     | °C                                   | 2002 – 2010    | Marspec    | WOA09      | M1       |
| Tide_M2      | Amplitude of M2 tidal constituent                    | 17.5 – 372.6  | ---                                  | ---            | FES2014    | AVISO+     | M1       |
| Turbidity    | Annual mean diffuse attenuation                      | 0.8 – 4.8     | m <sup>-1</sup>                      | 2002 – 2009    | Bio-ORACLE | Aqua-MODIS | M1       |
| Salinity     | Annual mean sea-surface salinity                     | 21.0 – 31.8   | PSS                                  | 2000 – 2014    | Bio-ORACLE | ARMOR      | M2       |
| O2           | Annual mean dissolved molecular oxygen               | 327 – 364     | mmol.m <sup>-3</sup>                 | 2000 – 2014    | Bio-ORACLE | PISCES     | M2       |
| Productivity | Annual mean primary productivity (carbon)            | 1.2 – 12.0    | g.m <sup>-3</sup> .day <sup>-1</sup> | 2000 – 2014    | Bio-ORACLE | PISCES     | M3       |
| T_winter     | Mean air temperature of the coldest quarter          | -25.0 – -19.7 | °C                                   | 1970 – 2000    | WorldClim  | MODIS      | F1       |
| T_summer     | Mean air temperature of the warmest quarter          | 4.9 – 10.7    | °C                                   | 1970 – 2000    | WorldClim  | MODIS      | F1       |
| P_winter     | Mean precipitation of the coldest quarter            | 40.2 – 171.5  | mm                                   | 1970 – 2000    | WorldClim  | GHCN       | F1       |
| P_summer     | Mean precipitation of the warmest quarter            | 114.7 – 250.1 | mm                                   | 1970 – 2000    | WorldClim  | GHCN       | F2       |
| WS_AREA      | Upstream catchment area (watershed, log-transformed) | 30 – 43,496   | km <sup>2</sup>                      | ---            | NHN        | ---        | F3       |

ARMOR = Global Observed Ocean Physics Reprocessing; AVISO+ = Archiving, Validation and Interpretation of Satellite Oceanographic data; GHCN = Global Historic Climate Network; MODIS = Moderate Resolution Imaging Spectroradiometer; NHN = National Hydrographic Network; ORAP = Global Ocean Physics Reanalysis ECMWF; PISCES = Global Ocean Biogeochemistry Non-assimilative Hindcast; WOA09 = World Oceanographic Atlas 2009

**Table 2.** Summary of sampling and basic statistics. Samples were collected on adult in rivers and lakes, with exceptions († in estuaries, ‡ on juveniles).

| <i>Region</i>        | <i>Code</i> | <i>Name</i>            | <i>LON</i> | <i>LAT</i> | <i>n</i> | <i>H<sub>o</sub></i> | <i>H<sub>e</sub></i> | <i>Polymorphic SNPs</i> | <i>N<sub>e</sub> (IC 95%)</i> |
|----------------------|-------------|------------------------|------------|------------|----------|----------------------|----------------------|-------------------------|-------------------------------|
| <i>Nunavik</i>       |             |                        |            |            |          |                      |                      |                         |                               |
| <i>Hudson Bay</i>    |             |                        |            |            |          |                      |                      |                         |                               |
| <i>Southern</i>      |             |                        |            |            |          |                      |                      |                         |                               |
|                      | IPI         | Ipikutuk River         | -78.38     | 58.73      | 24       | 0.178                | 0.167                | 11,408                  | 187.6 (3.2)                   |
|                      | SAP         | Saputaliuk River       | -78.36     | 58.7       | 17       | 0.19                 | 0.171                | 11,139                  | 61.9 (0.6)                    |
|                      | FMI         | Five Mile Inlet        | -78.21     | 58.56      | 24       | 0.163                | 0.168                | 11,739                  | 105.0 (1.0)                   |
| <i>Northern</i>      |             |                        |            |            |          |                      |                      |                         |                               |
|                      | KOA         | Korak River            | -77.63     | 60.75      | 28       | 0.181                | 0.183                | 13,015                  | 320.9 (6.8)                   |
|                      | CHU         | Chukotat River         | -78.02     | 60.79      | 15       | 0.185                | 0.189                | 12,286                  | 394.4 (21.2)                  |
|                      | KOV         | Kovik River            | -77.7      | 61.36      | 21       | 0.174                | 0.184                | 12,446                  | 81.2 (0.7)                    |
| <i>Hudson Strait</i> |             |                        |            |            |          |                      |                      |                         |                               |
|                      | BDE†        | Déception Bay          | -74.62     | 62.13      | 30       | 0.205                | 0.207                | 14,283                  | 327.3 (6.0)                   |
|                      | DUQ         | Duquet Lake            | -74.53     | 62.06      | 44       | 0.202                | 0.206                | 14,665                  | 446.7 (6.9)                   |
|                      | FRM         | François-Malherbe Lake | -74.25     | 62.04      | 38       | 0.205                | 0.207                | 14,611                  | 589.0 (14.0)                  |
|                      | DOU         | Douglas Harbour        | -72.65     | 62.06      | 29       | 0.2                  | 0.205                | 13,736                  | 170.6 (1.8)                   |
| <i>Ungava Bay</i>    |             |                        |            |            |          |                      |                      |                         |                               |
| <i>Western</i>       |             |                        |            |            |          |                      |                      |                         |                               |
|                      | PAY         | Payne River            | -70.7      | 60.01      | 30       | 0.194                | 0.201                | 13,614                  | 96.0 (0.5)                    |
|                      | CHR         | Red Dog River          | -69.79     | 59.3       | 39       | 0.19                 | 0.191                | 13,324                  | 167.2 (1.3)                   |
|                      | VOL         | Voltz River            | -69.66     | 59.25      | 25       | 0.196                | 0.19                 | 12,448                  | 207.4 (3.3)                   |
|                      | HAB†        | Hopes Advance Bay      | -69.63     | 59.32      | 24       | 0.191                | 0.192                | 12,638                  | 205.3 (3.5)                   |
|                      | FEU         | Leaf River             | -70.11     | 58.77      | 40       | 0.173                | 0.17                 | 11,303                  | 616.5 (17.9)                  |
|                      | BER         | Bérard River           | -69.97     | 58.65      | 36       | 0.202                | 0.208                | 14,279                  | 92.0 (0.4)                    |
| <i>Eastern</i>       |             |                        |            |            |          |                      |                      |                         |                               |
|                      | GEO         | George River           | -65.95     | 58.69      | 37       | 0.207                | 0.208                | 13,858                  | 734.5 (22.4)                  |
|                      | AKI         | Akilasaaluk River      | -65.4      | 59.06      | 17       | 0.211                | 0.21                 | 13,241                  | 188.1 (3.9)                   |
| <i>Baffin Island</i> |             |                        |            |            |          |                      |                      |                         |                               |
|                      | AVA         | Ava's Inlet            | -72.64     | 64.01      | 23       | 0.187                | 0.189                | 12,871                  | 233.3 (4.8)                   |
|                      | LHO         | Lake Harbour           | -69.82     | 62.82      | 38       | 0.206                | 0.192                | 13,114                  | 297.0 (4.1)                   |
|                      | PRZ         | Pritzler Harbour       | -67.32     | 62.12      | 27       | 0.199                | 0.202                | 13,669                  | 134.1 (1.3)                   |
| <i>Labrador</i>      |             |                        |            |            |          |                      |                      |                         |                               |
|                      | KAM‡        | Kamanatsuk River       | -62.54     | 56.74      | 19       | 0.211                | 0.209                | 13,996                  | 269.7 (6.9)                   |
|                      | ANA‡        | Anaktalik River        | -62.15     | 56.49      | 26       | 0.206                | 0.204                | 13,732                  | 74.7 (0.4)                    |



**Table 3.** Parameters of isolation-by-distance mixed effect models, displaying degrees of freedom (df), conditional Akaike information criteria (cAIC) and marginal R-Squared ( $R^2m$ ) compared to the null model.

|                      | All sites |         |        | Sites within 250 km of Hudson Strait |         |        |
|----------------------|-----------|---------|--------|--------------------------------------|---------|--------|
|                      | df        | cAIC    | $R^2m$ | df                                   | cAIC    | $R^2m$ |
| FST ~ 0              | 20.25     | -501.20 | --     | 8.38                                 | -133.68 | --     |
| FST ~ DIST           | 21.91     | -761.68 | 0.661  | 9.25                                 | -142.54 | 0.298  |
| FST ~ DIST + CROSSHS | 22.74     | -761.35 | 0.660  | 10.57                                | -163.65 | 0.447  |
| FST ~ DIST * CROSSHS | 23.75     | -761.59 | 0.659  | 11.68                                | -171.01 | 0.464  |

Figure 1: Sampling locations in Nunavik (Québec) and bordering regions. Red extents numbered 1 to 6 are magnified to show neighboring sampling locations. Catchment area for each site is displayed in green.

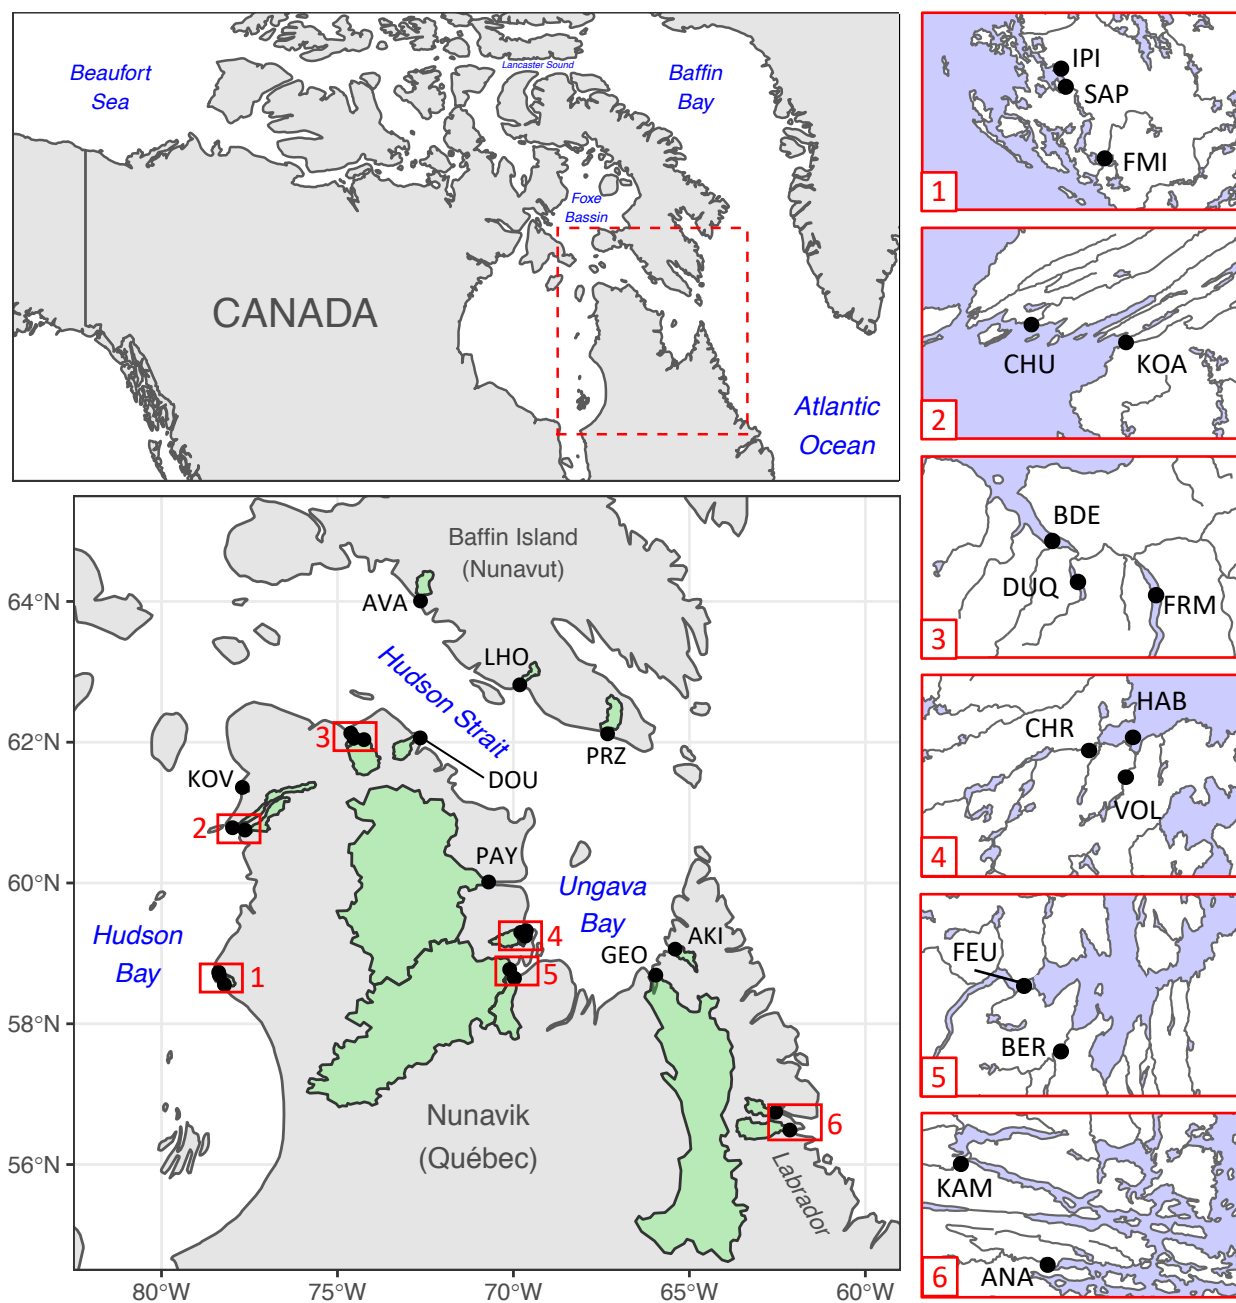

Figure 2: (A) Population structure assessed by a principal coordinate analysis (PCoA). Individual scores on PCoA axes 1 and 2 are presented as points and colored by geographical region. An ellipse representing a 95% confidence interval was drawn around each sampling site. The percentage of genetic variance explained by each axis is in parentheses. (B) Pairwise  $F_{ST}$  between neighboring sampling sites are shown, with line thickness proportional to values. Red extent is magnified to contrast  $F_{ST}$  between Leaf (FEU) and Bérard (BER) rivers (pairwise  $F_{ST} = 0.135$ ). Other pairs of grouped sampling sites had their  $F_{ST}$  values averaged for better visualization.

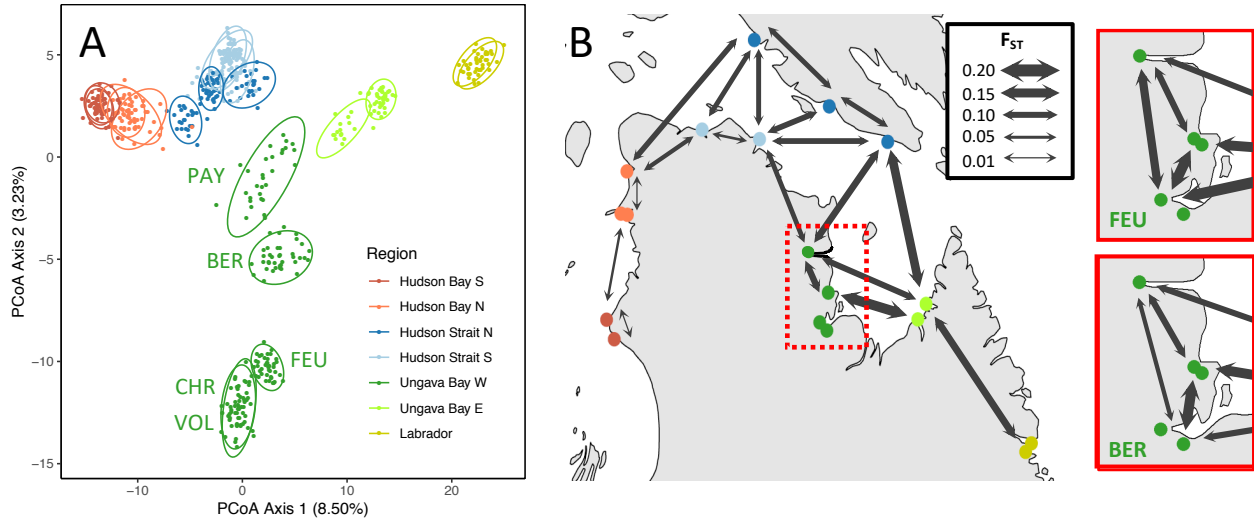

Figure 3: (A) Results of the hierarchical Bayesian clustering analysis implemented in ADMIXTURE for a number of genetic clusters (K) of 4, 6 and 13 (see Figure S3 for K = 2 to 16). Lower rows display the results for separate analyses on sampling sites sharing similar membership to clusters at K = 13, which yielded the lowest cross-validation error (CV). (B) Results of ADMIXTURE for K = 4 clusters, with individual ancestry averaged by sampling site and represented by pie charts. Approximative extent of glaciers, adapted from Dyke (2004), are represented by blue dashed lines for 6,000 - 11,000 years before present (BP).

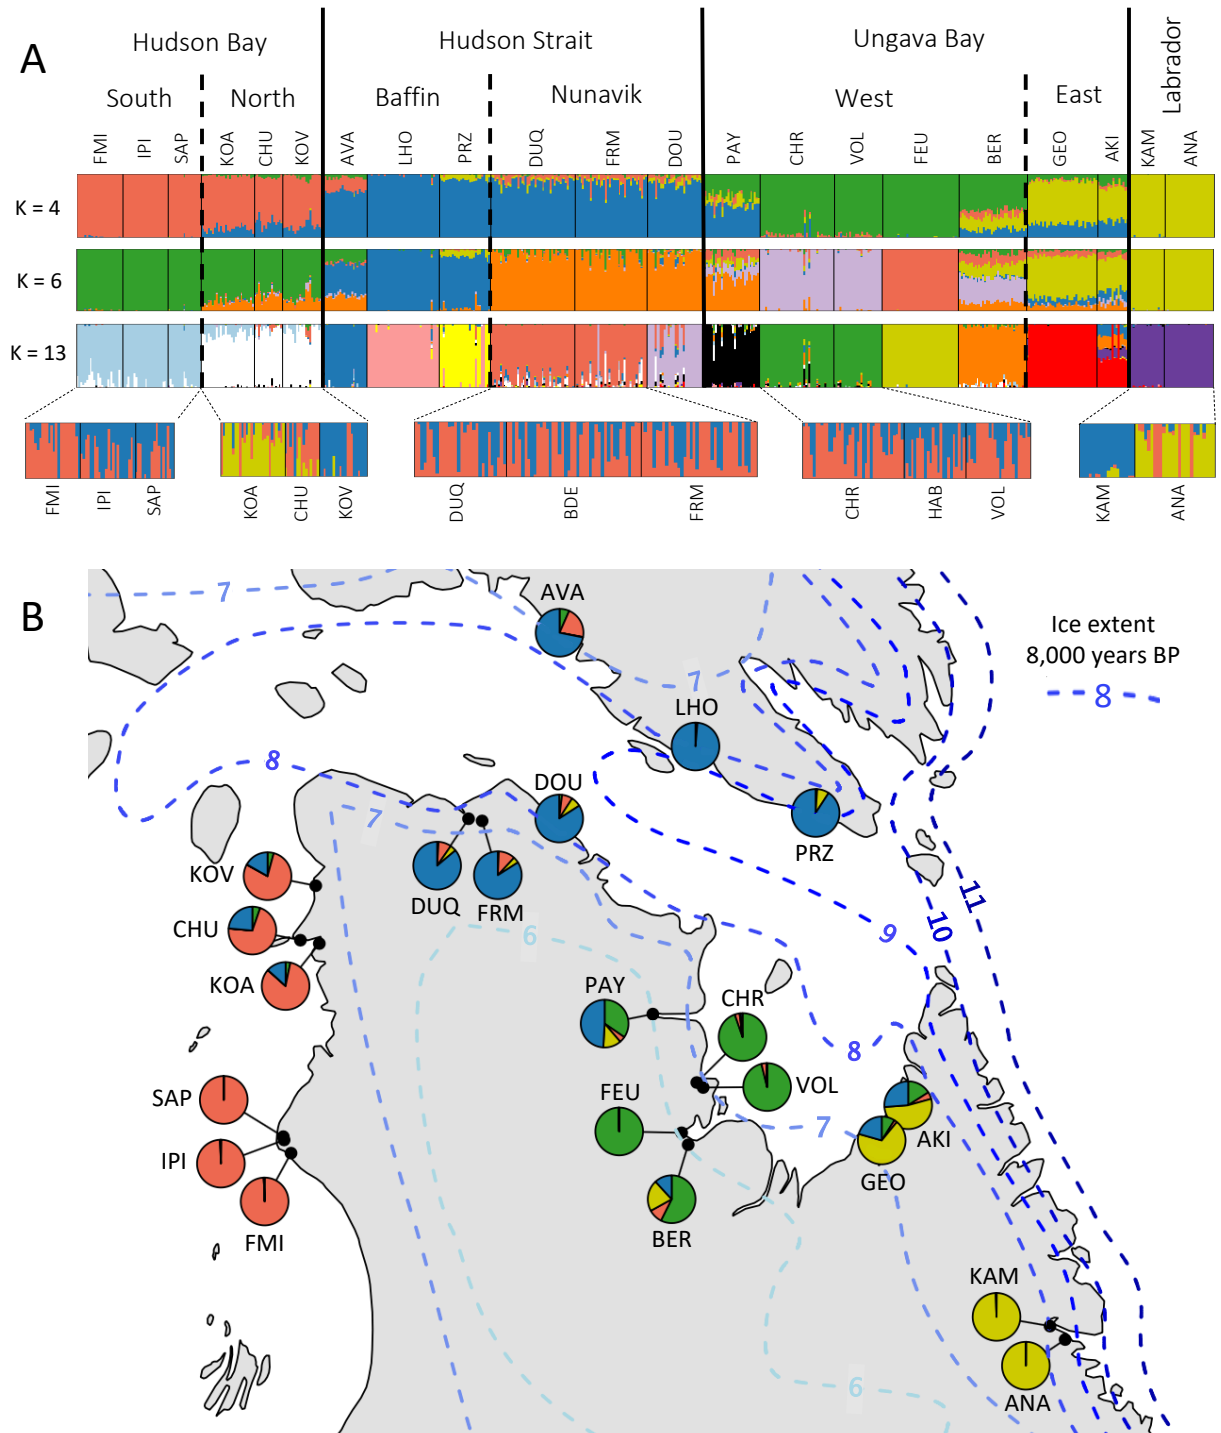

Figure 4: Individual proportion of heterozygous SNP markers in sampling sites, ordered following the coast from west to east, and colored by region. For each boxplot, bold line indicates mean, the box limits 25<sup>th</sup> and 75<sup>th</sup> percentile, and whiskers represent 10<sup>th</sup> and 90<sup>th</sup> percentile. Letters indicate group membership based on a comparison of least square means in a mixed-effect model (alpha = 0.05).

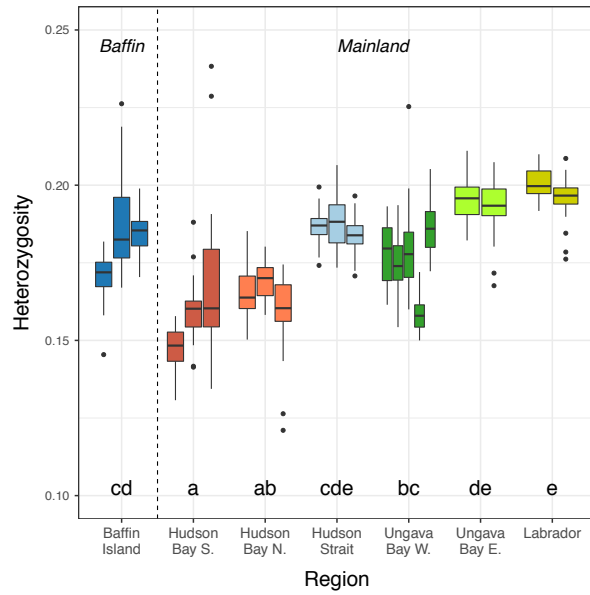

Figure 5: Isolation-by-distance represented by relation between marine distances and linearized pairwise  $F_{ST}$ , estimated between pairs of populations separated by Hudson Strait (red points) and on the same coast (blue triangles). Regression lines and 95% confidence intervals are plotted for mixed-effect models with fixed effects including marine distance and crossing of Hudson Strait. Models were fitted using (A) all sampling sites and (B) only sampling sites within 250 km of Hudson Strait.

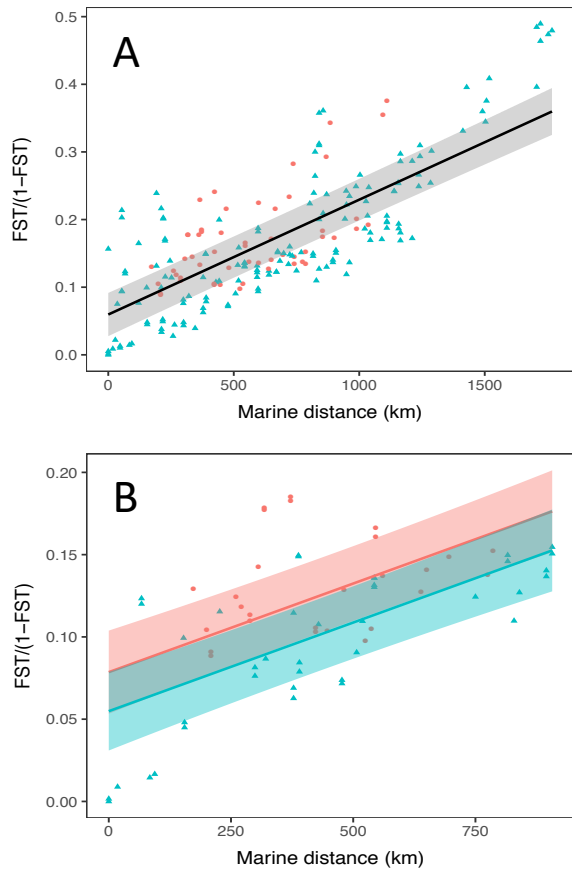

Figure 6: (A) Percentage of genetic variation explained by spatial (orange), marine (blue) and freshwater (green) factors in a redundancy analysis (RDA). Triplots for (B) axes 1 and 2, and (C) axes 2 and 3 in a RDA excluding spatial components. The dark grey cloud of points at the center of each plot represents the SNPs, and coloured points represent sampling sites with color coding by region. Triplots are magnified to highlight SNP loadings on (D) RDA axes 1 and 2, and (E) axes 2 and 3. Candidate SNPs are shown as colored points with coding by most highly correlated environmental predictor (see text for description). Vectors represent environmental predictors, according to the scales on top and right axes.

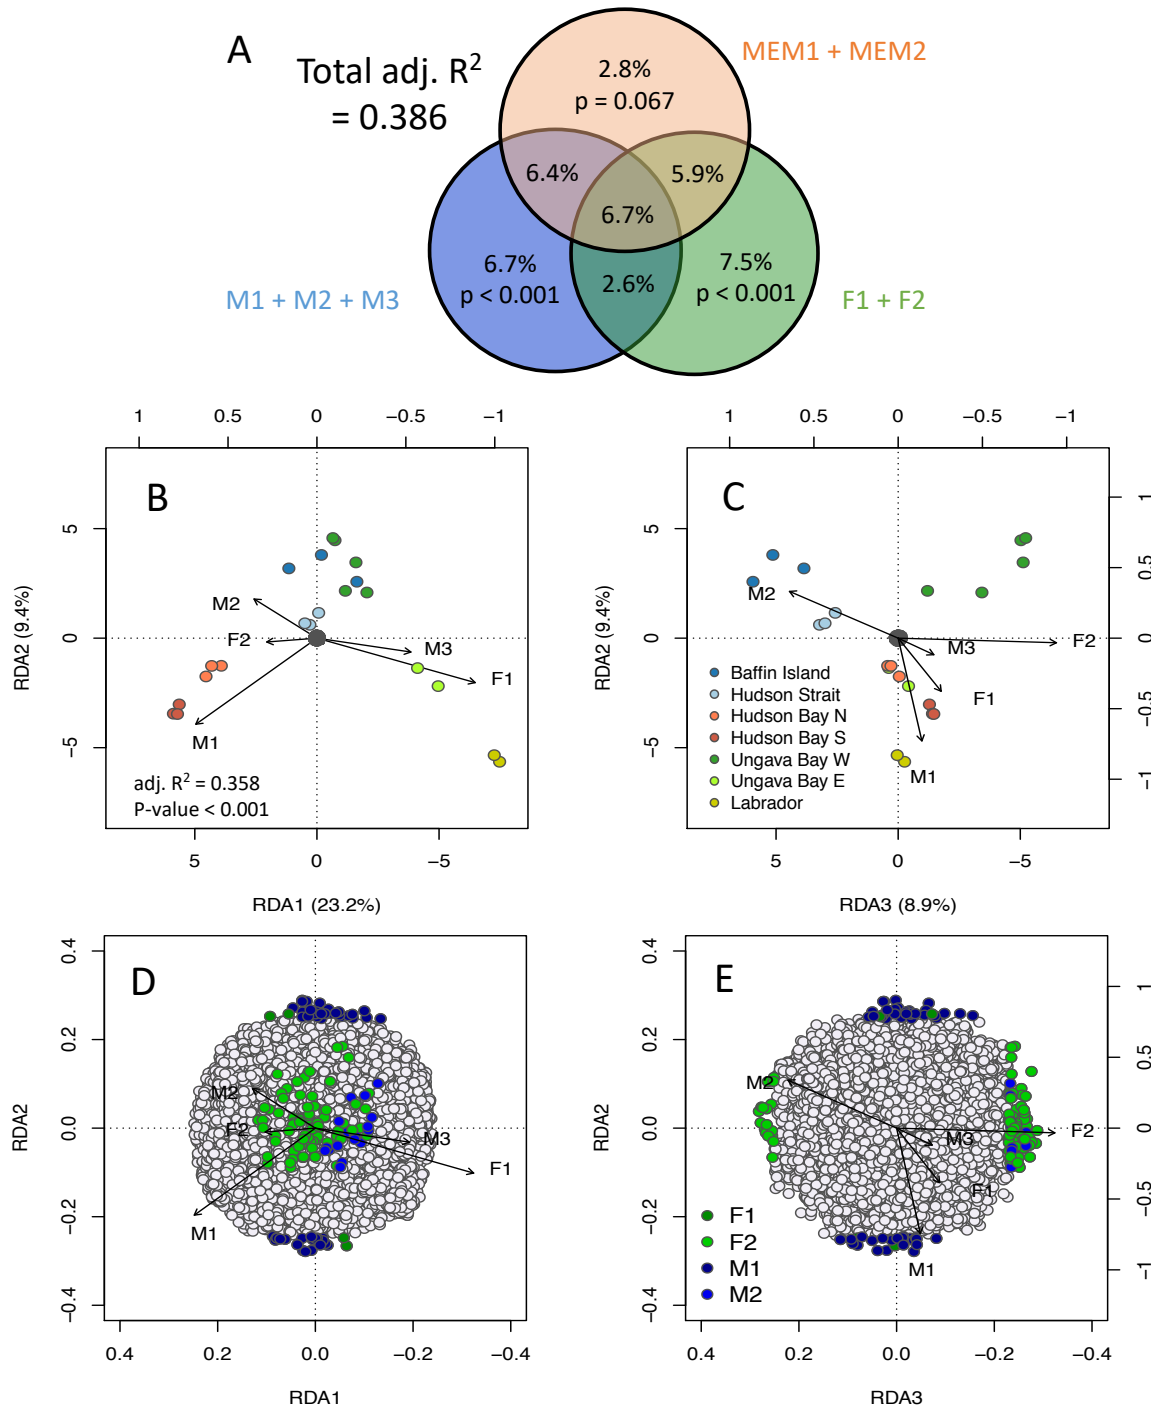

Figure 7: Intersection of candidate SNPs detected by three GEA methods. For each intersection, the box indicates the distribution of environmental components associated to candidate SNPs.

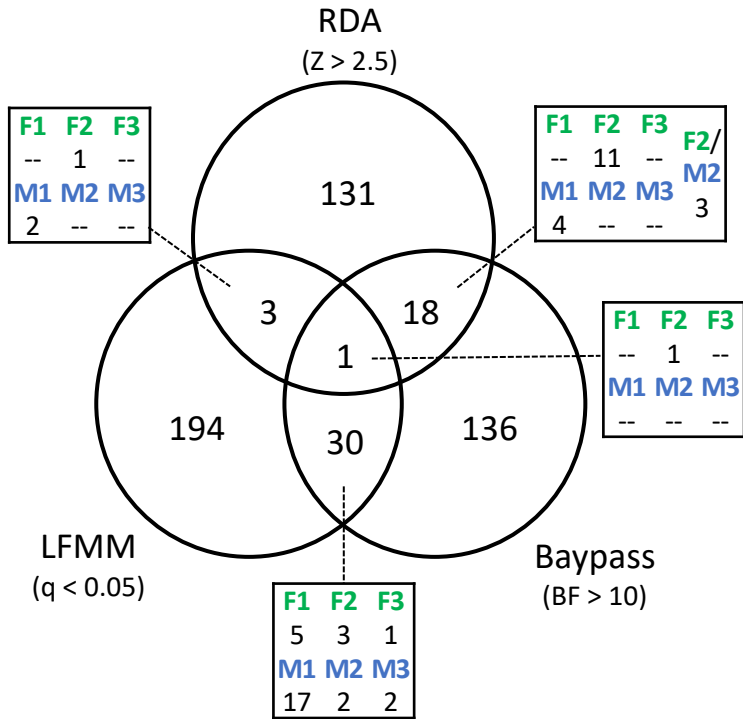



Figure 8: Allele frequency distribution of four candidate SNPs detected in GEA. Environmental components significantly associated to candidate SNPs are listed for each GEA method.

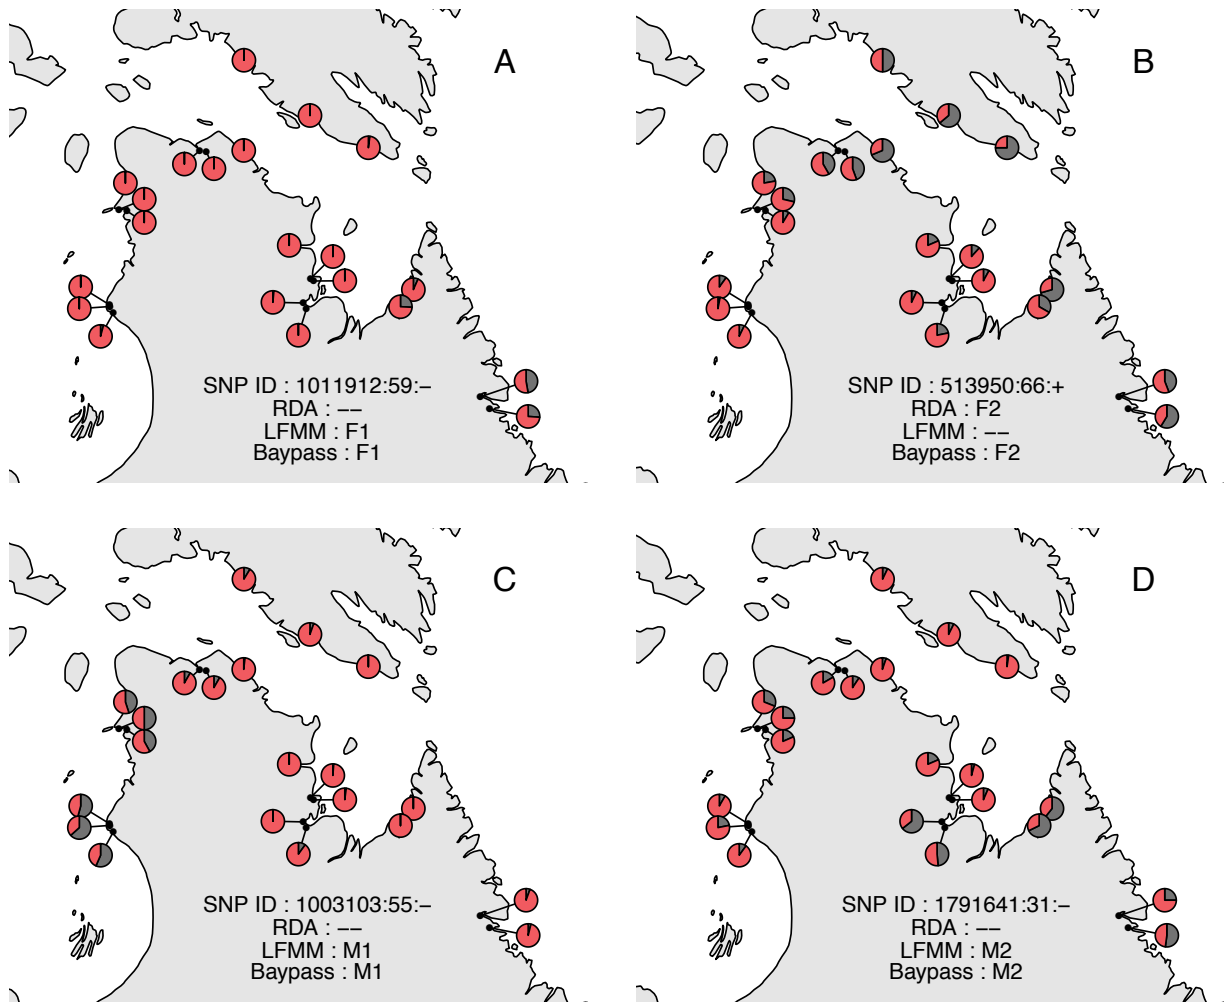

Source: https://www.biorxiv.org/content/10.1101/2020.04.29.066449v1.full.pdf
